# Supplementary material for: Engaging communities in non-communicable disease research and interventions in low- and middle-income countries: a realist review protocol
Source: PubMed Central journal article supplement — BMJ Open. 2021 Jul 21;11(7):e050632. doi: 10.1136/bmjopen-2021-050632 (PMC8296813; doi:10.1136/bmjopen-2021-050632), 2021-07-21
Supplement: bmjopen-2021-050632.draft_revisions.pdf [file bmjopen-2021-050632.draft_revisions.pdf]

# BMJ Open

BMJ Open is committed to open peer review. As part of this commitment we make the peer review history of every article we publish publicly available.

When an article is published we post the peer reviewers' comments and the authors' responses online. We also post the versions of the paper that were used during peer review. These are the versions that the peer review comments apply to.

The versions of the paper that follow are the versions that were submitted during the peer review process. They are not the versions of record or the final published versions. They should not be cited or distributed as the published version of this manuscript.

BMJ Open is an open access journal and the full, final, typeset and author-corrected version of record of the manuscript is available on our site with no access controls, subscription charges or pay-per-view fees (<http://bmjopen.bmj.com>).

If you have any questions on BMJ Open's open peer review process please email [info.bmjopen@bmj.com](mailto:info.bmjopen@bmj.com)

# BMJ Open

## Engaging communities in non-communicable disease research and interventions in low- and middle-income countries: a realist review protocol

|                               |                                                                                                                                                                                                                                                                                                                                                                                                                                                                                                                                                                                                                                                                                                                                                                                                                                                                                                                                                               |
|-------------------------------|---------------------------------------------------------------------------------------------------------------------------------------------------------------------------------------------------------------------------------------------------------------------------------------------------------------------------------------------------------------------------------------------------------------------------------------------------------------------------------------------------------------------------------------------------------------------------------------------------------------------------------------------------------------------------------------------------------------------------------------------------------------------------------------------------------------------------------------------------------------------------------------------------------------------------------------------------------------|
| Journal:                      | <i>BMJ Open</i>                                                                                                                                                                                                                                                                                                                                                                                                                                                                                                                                                                                                                                                                                                                                                                                                                                                                                                                                               |
| Manuscript ID                 | bmjopen-2021-050632                                                                                                                                                                                                                                                                                                                                                                                                                                                                                                                                                                                                                                                                                                                                                                                                                                                                                                                                           |
| Article Type:                 | Protocol                                                                                                                                                                                                                                                                                                                                                                                                                                                                                                                                                                                                                                                                                                                                                                                                                                                                                                                                                      |
| Date Submitted by the Author: | 02-Mar-2021                                                                                                                                                                                                                                                                                                                                                                                                                                                                                                                                                                                                                                                                                                                                                                                                                                                                                                                                                   |
| Complete List of Authors:     | <p>Klingberg, Sonja; University of the Witwatersrand Faculty of Health Sciences, SAMRC/Wits Developmental Pathways for Health Research Unit (DPHRU)</p> <p>Adhikari, Bipin; Mahidol University, Mahidol-Oxford Tropical Medicine Research Unit, Faculty of Tropical Medicine; University of Oxford, Centre for Tropical Medicine and Global Health, Nuffield Department of Medicine</p> <p>Draper, Catherine; University of the Witwatersrand, SAMRC/Wits Developmental Pathways for Health Research Unit (DPHRU)</p> <p>Bosire, Edna; University of the Witwatersrand Faculty of Health Sciences, SAMRC/Wits Developmental Pathways for Health Research Unit (DPHRU)</p> <p>Tiigah, Priscilla; Independent researcher</p> <p>Nyirenda, Deborah; University of Malawi, Community Engagement and Bioethics, Malawi-Liverpool-Wellcome Trust Clinical Research Programme</p> <p>Mukumbang, Ferdinand; University of Washington, Department of Global Health</p> |
| Keywords:                     | PUBLIC HEALTH, ETHICS (see Medical Ethics), PREVENTIVE MEDICINE                                                                                                                                                                                                                                                                                                                                                                                                                                                                                                                                                                                                                                                                                                                                                                                                                                                                                               |
|                               |                                                                                                                                                                                                                                                                                                                                                                                                                                                                                                                                                                                                                                                                                                                                                                                                                                                                                                                                                               |

SCHOLARONE™  
Manuscripts

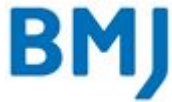

I, the Submitting Author has the right to grant and does grant on behalf of all authors of the Work (as defined in the below author licence), an exclusive licence and/or a non-exclusive licence for contributions from authors who are: i) UK Crown employees; ii) where BMJ has agreed a CC-BY licence shall apply, and/or iii) in accordance with the terms applicable for US Federal Government officers or employees acting as part of their official duties; on a worldwide, perpetual, irrevocable, royalty-free basis to BMJ Publishing Group Ltd ("BMJ") its licensees and where the relevant Journal is co-owned by BMJ to the co-owners of the Journal, to publish the Work in this journal and any other BMJ products and to exploit all rights, as set out in our [licence](#).

The Submitting Author accepts and understands that any supply made under these terms is made by BMJ to the Submitting Author unless you are acting as an employee on behalf of your employer or a postgraduate student of an affiliated institution which is paying any applicable article publishing charge ("APC") for Open Access articles. Where the Submitting Author wishes to make the Work available on an Open Access basis (and intends to pay the relevant APC), the terms of reuse of such Open Access shall be governed by a Creative Commons licence – details of these licences and which [Creative Commons](#) licence will apply to this Work are set out in our licence referred to above.

Other than as permitted in any relevant BMJ Author's Self Archiving Policies, I confirm this Work has not been accepted for publication elsewhere, is not being considered for publication elsewhere and does not duplicate material already published. I confirm all authors consent to publication of this Work and authorise the granting of this licence.

**TITLE:**

**Engaging communities in non-communicable disease research and interventions in low- and middle-income countries: a realist review protocol**

**AUTHORS:**

**Sonja Klingberg (corresponding author, ORCID: 0000-0002-9330-7102)**

SAMRC/Wits Developmental Pathways for Health Research Unit (DPHRU)

Faculty of Health Sciences

University of the Witwatersrand

Private Bag X3

Wits, Johannesburg 2050

South Africa

[sonja.klingberg@wits.ac.za](mailto:sonja.klingberg@wits.ac.za)

**Bipin Adhikari (ORCID: 0000-0001-8981-3910)**

Mahidol-Oxford Tropical Medicine Research Unit

Faculty of Tropical Medicine

Mahidol University

Bangkok

Thailand

and

Centre for Tropical Medicine and Global Health

Nuffield Department of Medicine

University of Oxford

Oxford

UK

**Catherine E. Draper (ORCID: 0000-0002-2885-437X)**

SAMRC/Wits Developmental Pathways for Health Research Unit (DPHRU)

Faculty of Health Sciences

University of the Witwatersrand

Johannesburg

South Africa

**Edna N. Bosire (ORCID: 0000-0002-4781-7101)**

SAMRC/Wits Developmental Pathways for Health Research Unit (DPHRU)

Faculty of Health Sciences

University of the Witwatersrand

Johannesburg

South Africa

**Priscilla Tiigah**

Independent researcher

London

UK

1  
2  
3 **Deborah Nyirenda (ORCID: 0000-0002-5867-4687)**

4 Community Engagement and Bioethics

5 Malawi-Liverpool-Wellcome Trust Clinical Research Programme

6 Blantyre

7 Malawi

8  
9  
10 **Ferdinand C. Mukumbang (ORCID: 0000-0003-1441-2172)**

11 Department of Global Health

12 University of Washington

13 Seattle

14 USA

15  
16  
17  
18 **Word count:**

19 **3350/4000**

20  
21  
22  
23 **Keywords:**

24 **Community engagement; non-communicable diseases; low- and middle-income**  
25 **countries; realist review; critical realism**  
26  
27  
28  
29  
30  
31  
32  
33  
34  
35  
36  
37  
38  
39  
40  
41  
42  
43  
44  
45  
46  
47  
48  
49  
50  
51  
52  
53  
54  
55  
56  
57  
58  
59  
60

## ABSTRACT

### Introduction

Engaging communities and intended beneficiaries at various stages of health research is a recommended practice. The contribution of community engagement to non-communicable disease research in low- and middle-income countries has not yet been extensively studied or synthesised. This protocol describes the steps towards generating an understanding of community engagement in the context of non-communicable disease research, prevention and health promotion using a realist review approach. A realist lens enables a rich explanatory approach to causation, and an openness to multiple outcomes, including unintended consequences. The review will thus develop an understanding of community engagement without assuming that such practices result in more ethical research or effective interventions.

### Methods and analysis

We propose a critical realist approach aiming to examine how, why, under what circumstances, and for whom, community engagement works or does not work. The iterative review steps include clarifying the review scope; searching for evidence; appraising studies and extracting data; synthesising evidence and drawing conclusions; and disseminating, implementing and evaluating the findings. Principles of meta-narrative review (pragmatism, pluralism, historicity, contestation, reflexivity and peer review) are employed to ensure practicable and contextualised review outputs. The proposed review will draw on theoretical and empirical literature beyond specific diseases or settings, but with a focus on informing non-communicable disease research and interventions in low- and middle-income countries. The synthesis of existing literature will be complemented by qualitative realist interviews and stakeholder consultation. Through drawing on multiple types of evidence and input from both experts and intended beneficiaries, the review will provide critical and pragmatic insights for research and community engagement in low- and middle-income countries.

### Ethics and dissemination

Ethical approval has been obtained from the University of the Witwatersrand. Dissemination will include traditional academic channels, institutional communications, social media and discussions with a wide range of stakeholders.

(296/300 words)

## ARTICLE SUMMARY

### Strengths and limitations of this study

- The critical realist review approach adopted will provide novel explanatory evidence, transcending mere descriptions to unearth what mechanisms and contextual elements are at play to achieve meaningful community engagement with non-communicable disease research in low- and middle-income countries.
- The review will integrate information obtained from multiple sources to develop robust explanatory models on the specifics of interventions around non-communicable diseases.
- The protocol draws on the meta-narrative review principles of pragmatism, pluralism, historicity, contestation, reflexivity and peer review to ensure a rich and rigorous synthesis despite a paucity of specific evidence from low- and middle-income countries.
- Effective stakeholder engagement with a diverse range of stakeholders is somewhat limited by the COVID-19 pandemic.

## INTRODUCTION

### Community engagement

The concept and practices of community engagement can be traced back to the pursuit of participatory approaches in scientific research from the 1960s onwards, particularly in the fields of global health and international development.[1] In the context of health research, community engagement can be viewed as a strategy for building and maintaining “relationships between researchers and the stakeholder community — the unique collection of diverse stakeholders who have interests in the conduct and/or outcomes of a given research project”. [2] Community engagement is, however, used to refer to a multitude of practices, and the concept is somewhat ambiguous when it comes to both terms, ‘community’ and ‘engagement’. [3–5] Communities can, for example, consist of intended beneficiaries, residents of a particular geographical area, or a group of individuals with shared interests or connected identities. However, researchers and the perceived communities may have rather different understandings of what constitutes a community, and who belongs to it. [6] Engagement can mean: minimal outreach with limited involvement from stakeholders, mostly with the purpose of providing them information about the research; consultation with some input from stakeholders to researchers; stakeholder and participant involvement at different stages of research; different forms of collaboration; and, most comprehensively, shared leadership with a strong bidirectional relationship between stakeholders and researchers. [7] In practice, the involvement of non-academic stakeholders through practices such as community engagement or participatory methods plays an important role in public health research and interventions; and large funding bodies are increasingly emphasising community or public engagement when awarding grants for large trials. [2, 7–9]

Guidance for developing and evaluating complex public health interventions recommends involving intended beneficiaries and other relevant stakeholders throughout the process. [10, 11] Approaches such as co-design or co-production are gaining popularity, at least within the jargon used to describe intervention research. [12] While there are many ethical and practical reasons [13] to promote the participation of community members and stakeholders in different phases of research, intervention development, implementation and dissemination, there are also numerous reasons for individuals or communities to not want to engage with research either as participants or in advisory roles. Moreover, those individuals or groups who do participate actively in shaping research questions or guiding intervention design bring with them their own agendas, which may or may not align with other intended outcomes of research and interventions.

In recognition of this complexity, Abimbola [14] has called for a move beyond a positive *a priori* bias in favour of community engagement, which typically involves assumptions that people want to participate in decision-making about their health, and that community engagement will generally lead to favourable outcomes. These assumptions are particularly important to question in the context of non-communicable disease (NCD) prevention. Although NCDs are the leading causes of morbidity and mortality worldwide, and increasingly so in low- and middle-income countries (LMICs), the prevention of NCDs has tended to be deprioritised vis-à-vis problems perceived as more acute and urgent. [15]

Previous research on community engagement and participatory research approaches indicate that trust and power-sharing between researchers and communities, [16, 17] and expected or tangible benefits received by the community, [18] play a role in contributing



1  
2  
3 towards how appealing engagement is from the point of view of potential participants and  
4 targeted communities. Furthermore, factors such as resource constraints, varying levels of  
5 education, existing inequalities, historical tensions, or even a history of harm done under the  
6 guise of public health research, are bound to influence people's willingness and ability to  
7 engage with research or interventions.[14,17–19] It is, therefore, important to examine how  
8 different approaches to community engagement, from purely researcher-led to more  
9 community-centred or transformative practices with more power-sharing, may have different  
10 outcomes in terms of ethics, effectiveness, scalability and sustainability.[7,20–22]

11  
12  
13 As described by Adhikari and colleagues,[3] the goals of community engagement in health  
14 research can broadly be divided into research-related and ethical outcomes, although there  
15 are notably also overlaps between these categories. For example, enhancing participant  
16 recruitment and ensuring retention are predominantly research-related goals of community  
17 engagement, while supporting the consent process can be seen as both an ethical and a  
18 research-related goal. In practice, without deliberate effort,[2] even the ethical goals of  
19 community engagement, such as minimising risks, burdens and exploitation may not go  
20 much beyond institutional demands for research ethics, which do not necessarily capture  
21 community interests beyond minimising obvious harms.[23] Indeed, it is important to  
22 acknowledge that community engagement itself can be harmful or contribute to harmful  
23 research.[18] This review will therefore explore an understanding of the contexts and  
24 mechanisms that produce harmful outcomes, and those that can protect participants and  
25 communities from harm.  
26  
27  
28  
29  
30  
31

### 32 **NCD prevention and community engagement in LMICs**

33  
34 NCDs comprise a huge variety of diseases and conditions to which over 70% of the global  
35 burden of mortality can be attributed.[24] Globally, a vast majority of NCD-related deaths  
36 occur in LMICs that are seeing a shift from predominantly communicable diseases and  
37 childhood illnesses to a disease burden characterised mostly by NCDs.[25] An increased  
38 focus on NCD prevention, management and treatment has been seen in both research and  
39 policy, but funding priorities still often reflect a focus on specific communicable  
40 diseases.[26,27]  
41

42  
43 If health promotion is seen as “the process of empowering people to increase control over  
44 their health and its determinants”,[28] community engagement and participatory approaches  
45 are suitable elements for research that aims to prevent NCDs and promote health. However,  
46 due to the prevailing perceptions in many settings that NCDs are ‘lifestyle’ illnesses, non-  
47 urgent or self-inflicted,[15] and the often relatively asymptomatic nature of some NCDs such  
48 as hypertension,[29] it can be expected that interest for engaging with NCD prevention  
49 efforts may be limited among communities affected by NCDs. Indeed, qualitative evidence  
50 from South Africa suggests that the immediacy of concerns such as unemployment, safety  
51 and food insecurity understandably mean that potential future health outcomes are low on  
52 many people's agendas, and ‘health and its determinants’ are not under individuals' control  
53 due to socio-economic and structural constraints.[30–32]  
54  
55

56  
57 Nevertheless, there are also examples of successful engagement of communities in  
58 addressing NCDs in LMIC settings. A community-based diabetes prevention trial in  
59 Bangladesh found participatory learning and action groups to be an effective intervention to  
60

1  
2  
3 prevent type 2 diabetes, while also utilising methods such as participatory visual analysis to  
4 engage participants in interpreting the results of the trial.[33–35] Similarly, a successful  
5 community-based mental health intervention called the ‘Friendship Bench’ was developed in  
6 Zimbabwe following community stakeholders’ call for an intervention.[36,37] Globally, civil  
7 society actors play a pivotal role in involving community voices and the lived experience of  
8 people with NCDs in campaigns and advocacy demanding government action on NCDs.[38]  
9

10  
11 For the purposes of this review, community engagement is conceptualised as a part of NCD  
12 research or interventions rather than an intervention or programme on its own. Research or  
13 interventions can take place without community engagement, and communities can carry out  
14 activities without any connection to research or interventions. In this sense, community  
15 engagement can be viewed as a bridge that connects research or intervention to a  
16 community. As illustrated in Figure 1, community-based interventions without community  
17 engagement (1A) can have both intended and emergent outcomes. With community  
18 engagement (1B), the same is true, but the range of different potential outcomes may be  
19 wider due to the added element of community engagement.  
20  
21

22 [Figure 1 here]  
23  
24  
25

### 26 **Critical realism and realist reviews**

27  
28 Critical realism is a philosophy of science that draws on elements of positivist and  
29 interpretivist paradigms to propose an understanding of social activity whereby both social  
30 structure (organised set of social institutions and patterns of institutionalized relationships)  
31 and agency (thoughts and actions taken by people) find a place.[39,40] Critical realism as a  
32 research paradigm supports claims to be made by hypothesising the existence of  
33 mechanisms – underlying entities that cause an event to occur – that produce social  
34 events.[41] Realist methodology, building on critical realism, is increasingly used to evaluate  
35 public health interventions while maintaining an openness to both intended and unintended  
36 outcomes. It enables in-depth analyses of different causal mechanisms at play in generating  
37 those outcomes and *in tandem* consideration of contextual elements that (dis)activate these  
38 mechanisms.[42]  
39  
40  
41

42 While more traditional reviews of public health interventions, especially systematic reviews,  
43 tend to be concerned with the effectiveness of said interventions in achieving intended and  
44 clearly specified outcomes, realist reviews combine theory and empirical observations to  
45 uncover how, why and for whom such interventions work or not by adopting an explicit  
46 explanatory approach.[43–45] The key outputs of realist reviews are, therefore, theories and  
47 models of generative causation, often captured by a heuristic that explain how entities such  
48 as contexts and mechanisms interact in different ways to produce different intended or  
49 emergent (unintended) outcomes. The functioning of contexts and mechanisms in ways that  
50 produce outcomes is captured by configurations referred to as CMO configurations. These  
51 concepts, and other central terms used in this review protocol, are defined in Table 1. While  
52 realist-informed research may also make use of other explanatory factors,[46] such as  
53 interventions and actors, as part of heuristic configurations, the starting point for the  
54 proposed review is to utilise CMO configurations as it provides sufficient explanatory depth  
55 and coherence. Other elements may be introduced if the review process seems to require it  
56 for clarity and to enhance realist causal explanations.  
57  
58  
59  
60

**Table 1 Key concepts**

| Concept                                       | Definition                                                                                                                                                                                                                                                                                                                                         |
|-----------------------------------------------|----------------------------------------------------------------------------------------------------------------------------------------------------------------------------------------------------------------------------------------------------------------------------------------------------------------------------------------------------|
| Critical realism                              | A philosophy of science that combines positivist (the paradigm underpinning natural sciences) and interpretivist (a paradigm that emphasises experiences and interpretations over the 'objective' truth assumed by positivism) understandings of the world.[47]                                                                                    |
| Realist review                                | A theory-driven approach to reviewing and synthesising literature in order to provide an explanation of how, why, for whom and under what circumstances programmes, policies and interventions work or do not work.[43,44]                                                                                                                         |
| Programme theory                              | Theories that link activities and outcomes to explain how and why a change is expected to take place, representing how the mechanisms introduced into pre-existing contexts can generate outcomes.[48]                                                                                                                                             |
| Context (C)                                   | The setting (e.g. individual, organisational and environmental characteristics) and historical elements that can potentially (dis)activate existing or introduced mechanisms.[45]                                                                                                                                                                  |
| Mechanism (M)                                 | An underlying entity that produces specific outcomes in specific contexts. Mechanisms are a combination of resources (e.g. components of an intervention) and responses (e.g. the perceptions of participants) highlighting the importance of examining how interventions are received as opposed to merely considering how they are intended.[45] |
| Outcome (O)                                   | Expected or actual change achieved by the combination of specific contexts and mechanisms.[45]                                                                                                                                                                                                                                                     |
| Context-mechanism-outcome (CMO) configuration | CMO configurations are representations of a causal relationship between contexts and mechanisms that lead to specific outcomes.[45]                                                                                                                                                                                                                |
| Community engagement in research              | A strategy for building and maintaining "relationships between researchers and the stakeholder community — the unique collection of diverse stakeholders who have interests in the conduct and/or outcomes of a given research project".[2]                                                                                                        |
| Participatory research                        | A research approach that involves research participants at different stages of the research process, for example planning and analysis, rather than merely as informants or recipients of an intervention. Many different methods, such as visual participatory analysis, exist under this general approach.[34]                                   |
| Health promotion                              | Health promotion refers to actions and processes that create better conditions for health through, for example, strengthening people's control over their own health and addressing societal determinants of ill-health.[28]                                                                                                                       |

## Aim and objectives

This realist review protocol proposes steps towards generating an understanding of how and why community engagement enhances the benefits (or not) of interventions to facilitate NCD-related research, prevention and health promotion in LMIC settings. More specifically, the objectives of the realist review are:

- 1) To review existing theoretical and empirical literature across disciplines and settings to understand how, why, for whom and in what contexts community engagement and participatory research approaches work or not.
- 2) To situate community engagement and health research in historical perspectives, vis-à-vis bioethics and, for example, legacies of exploitative medical research and other past transgressions, including top-down or irrelevant interventions.
- 3) To inform and formulate recommendations for future research and interventions with a focus on drawing lessons for ethical, community-centred NCD prevention research and health promotion in LMIC settings.

## Context of the review

The need for a realist review stems from current work around NCD prevention and preconception health promotion in South Africa, and a recognition that the pursuit of ethical research informed by community perspectives is challenging when the health topics in question are, understandably, low on intended beneficiaries' agendas. SK and CED are involved in various research initiatives in South Africa, including qualitative research on improving community engagement practices in Soweto. However, the author team and advisors include experiences and perspectives from a range of settings beyond South Africa, helping to ensure that any transferable findings of the review can be drawn on more widely.

Currently, another realist review of community engagement with health research is being conducted by BA and other colleagues with a focus on malaria trials or other communicable disease interventions in LMICs.[8] We are not aware of other realist reviews of community engagement in NCD prevention and health promotion in LMICs, and thus consider our work to be complementary rather than a duplication of existing or ongoing work.

## METHODS AND ANALYSIS

### Study design

The design of this review is based on the realist review process developed by Pawson et al.,[44] RAMESES guidelines[43,49] and recently published realist review protocols.[8,50–52] The realist review process is iterative and not as linear or rigid as a traditional systematic review.[53] It is, therefore, complex and not fully predictable, with decisions and changes being made along the way as opposed to all criteria and specifications being predefined. In addition to specific guidance for realist reviews, this review also draws on the six cross-cutting principles of meta-narrative reviews: pragmatism, pluralism, historicity, contestation, reflexivity and peer review.[49] Their definitions and roles in the proposed review are summarised in Figure 2. The following sections describe the five planned review steps, as well as progress so far, but it is likely that the exact process will evolve somewhat as the review takes shape.

[Figure 2 here]

### Step 1: Clarify scope

This step involved refining the review focus and purpose through initial informal searches, discussions, and drawing on existing theoretical and empirical literature. In terms of identifying literature and developing initial theories, the starting point was finding published articles on community engagement in NCD prevention in LMICs. This was soon expanded to include any setting, particularly literature from high-income countries that describes community engagement or participatory research with Indigenous communities, as this literature often explicitly grapples with histories of harm inflicted through research.[17,19] After thorough and iterative discussions about the review aim and objectives, two articles identified through initial, evolving searches and reading were selected ('berrypicking'[54]) to elicit the initial theories.[41] The rationale for selection was to allow a consideration of both beneficial and harmful engagement, and relevance for NCDs, even if not explicitly describing NCD research or interventions.[17,18] A list of initial theories was first elicited through abductive thinking and retroductive theorising.[55] This meant considering the outcomes of research and interventions described in the two selected studies, and "working backwards to think about the conditions of reality that are necessary for such effects to manifest".[55] The list was developed into a conceptual diagram, and the theories were further abstracted following discussions within the author team.

Based on these phases described under Step 1, Figure 3 illustrates the initial selection of different salient CMO configurations. The micro theories within the model are potential causal trajectories, presented from the perspective of participants or community members as the primary actors. The figure, therefore, captures how their perceptions and experiences (including past encounters with research or interventions) mediate how new engagement occurs. This enables the review to remain open to both positive and negative, intended and emergent, and ethical or other outcomes. For example, historical trust (C) between a community and researchers can lead to perceived transparency, and information about research or an intervention to be well received (M), which can lead to outcomes (O) such as high participation, improved health outcomes, and reinforced relationships and trust between the community and researchers. The initial exploratory model is not unique to NCDs, and can thus apply more broadly to health promotion efforts and research that utilise community engagement. Through later steps of the review, the focus will be to refine the initial exploratory theory to specifically inform NCD research and interventions.

Stakeholder consultation has been initiated through online correspondence with researchers who are able to give input on the review focus and initial theories based on their experience and expertise of community engagement or realist research. More comprehensive stakeholder engagement will be undertaken at later stages.

[Figure 3 here]

### Step 2: Search for evidence

Informed by the first step, a semi-systematic approach to literature searching has been developed and piloted, and will be implemented by SK. This will involve using combinations of search terms such as "community engagement", participatory, "non-communicable disease", community-led, "low-income country", "middle-income country", LMIC, NCD, Indigenous, diabetes, hypertension, "blood pressure", cardiovascular, cancer, chronic, "mental health", depression, anxiety, intervention, prevention and more in PubMed, Scopus and Google Scholar, as well as forward and backward reference checking and recommendations from stakeholders. The search will focus on NCDs to ensure a

manageable scope, but other literature will be included where it can be expected to inform the review due to potentially similar mechanisms.[56] Further iterations of the search will likely be undertaken as the review progresses, and these will be reported on transparently.

Study selection will be purposive, meaning that the review is not expected to represent the existing evidence base in its entirety, but rather only include what the authors deem relevant for expanding, refuting, or refining the initial theories. Initial screening of studies based on title, abstract and keywords will take place simultaneously to the searches. Selected articles may be NCD-focused studies or accounts of other health research or intervention work, or any other topic, using any research design, that may feasibly inform community engagement in NCD research and interventions in LMICs. Out of studies initially identified as potentially relevant, SK will select studies in consultation with other reviewers.

The following inclusion criteria will be utilised:

- Study design: Any
- Publication date: Any, with priority given to more recent studies or particularly influential older studies that have informed later research and practice
- Document type: Any that can inform the review, including commentaries and practice-based articles, as long as they come from peer-reviewed journals or reputable and relevant sources of grey literature[57,58]
- Population or setting: Any, with priority given to LMICs or Indigenous or other historically marginalised communities in high-income countries
- Content: Describes some aspect of community engagement or participatory research approaches, or provides relevant perspectives and applicable information beyond these topics even if focusing on communicable diseases or NCD management rather than prevention
- Language: English

### Step 3: Appraise studies and extract data

Data extraction and appraisal will be carried out using a piloted template developed specifically for this realist review. Further inclusions and exclusions of literature, and refinement of inclusion criteria, may occur at this point. This step of the process will incorporate the review team's judgement with existing quality assessment criteria for different study designs, and a consideration of 'fitness for purpose', guided by the two key criteria of relevance (does the research address the review's objectives and theories being developed?) and rigour (do the conclusions put forward by researchers or the review team hold in relation to the data presented?) as well as the six principles detailed in Figure 2.[44]

### Step 4: Synthesise evidence and draw conclusions

Analysis and synthesis of data extracted in the previous step will be carried out through further iterations of abductive thinking and retroductive theorising to elicit new theories and build on the initial theories.[54] Counterfactual thinking will be applied with the help of evidence that seems to refute or disagree with the emerging conclusions. These analytical phases will be done in consultation with the review team and stakeholders to further develop, refine or refute the initial programme theory, as well as consider historical context (e.g. colonialism, ethically sound or exploitative research, and donor dynamics) of findings. The analysis and synthesis of review findings to draw conclusions will be a particularly iterative

1  
2  
3 step in the process, and changes in programme theory will be documented and transparently  
4 reported to show a trail of gradual theory building.  
5  
6

### 7 **Step 5: Disseminate, implement and evaluate**

8  
9 The output of this proposed review is expected to have practical applications in NCD  
10 research, interventions and other health promotion efforts. To ensure this, further stakeholder  
11 consultation will be carried out in the form of discussions and realist interviews[59] with  
12 researchers, activists and community members in the research context in which SK and CED  
13 work in Soweto. These consultations will contribute to further iterations of the review steps as  
14 relevant, and form an evaluative component of the review, through which the six guiding  
15 principles can be further realised.[49] See Ethics and dissemination for further details about  
16 dissemination and implementation.  
17  
18

### 19 **Patient and Public Involvement**

20  
21 This realist review involves stakeholder consultation at different stages. Initial expert  
22 stakeholder consultation has targeted researchers internationally, whereas later stages will  
23 gather input from researchers, practitioners, community organisations and individuals in  
24 South Africa through the consultation process described above, and an adjacent qualitative  
25 study of community engagement in health research in Soweto. Utilising in-depth qualitative  
26 methods, such as realist interviews[59] in combination with informal online (email, video call)  
27 feedback consultations with experts, will enable capturing varied input on theories and other  
28 review findings from a range of stakeholders.  
29  
30  
31  
32  
33

### 34 **Ethics and dissemination**

35  
36 Formal ethics review is not required for the review itself, as it constitutes secondary research  
37 with element of peer feedback from relevant researchers. Ethical approval has been obtained  
38 (M200641) from the University of the Witwatersrand Human Research Ethics Committee  
39 (Medical) for wider stakeholder consultation, including qualitative fieldwork with a range of  
40 participants. Dissemination will include traditional academic channels (publications,  
41 conferences, seminars), inclusion of findings in new community engagement strategies  
42 developed by authors for their research units, as well as sharing of findings at community  
43 engagement events in South Africa, through plain language publications or summaries,  
44 social media and in discussions with a wide range of stakeholders.  
45  
46  
47  
48  
49  
50  
51  
52  
53  
54  
55  
56  
57  
58  
59  
60

## REFERENCES

- 1 Reynolds L, Sariola S. The ethics and politics of community engagement in global health research. *Crit. Public Health*. 2018;**28**:257–68. doi:10.1080/09581596.2018.1449598
- 2 King KF, Kolopack P, Merritt MW, *et al.* Community engagement and the human infrastructure of global health research. *BMC Med. Ethics*. 2014;**15**:84. doi:10.1186/1472-6939-15-84
- 3 Adhikari B, Pell C, Cheah PY. Community engagement and ethical global health research. *Glob Bioeth* 2020;**31**:1–12. doi:10.1080/11287462.2019.1703504
- 4 Marsh VM, Kamuya DK, Parker MJ, *et al.* Working with concepts: The role of community in international collaborative biomedical research. In: *Public Health Ethics*. Public Health Ethics 2011. 26–39. doi:10.1093/phe/phr007
- 5 Wilkinson A, Parker M, Martineau F, *et al.* Engaging ‘communities’: Anthropological insights from the west African ebola epidemic. *Philos Trans R Soc B Biol Sci* 2017;**372**. doi:10.1098/rstb.2016.0305
- 6 Hamed S, Klingberg S, Mahmud AJ, *et al.* Researching health in diverse neighbourhoods: critical reflection on the use of a community research model in Uppsala, Sweden. *BMC Res Notes* 2018;**11**:612. doi:10.1186/s13104-018-3717-7
- 7 Clinical and Translational Science Awards Consortium Community Engagement Key Function Committee Task Force on the Principles of Community Engagement. *Principles of Community Engagement, Second Edition*. 2011.
- 8 Adhikari B, Vincent R, Wong G, *et al.* A realist review of community engagement with health research. *Wellcome Open Res* 2019;**4**:87. doi:10.12688/wellcomeopenres.15298.2
- 9 Dickert N, Sugarman J. Ethical goals of community consultation in research. *Am. J. Public Health*. 2005;**95**:1123–7. doi:10.2105/AJPH.2004.058933
- 10 Bartholomew Eldredge LK, Markham CM, Ruitter RAC, *et al.* *Planning health promotion programs : an intervention mapping approach*. 4th editio. Jossey-Bass 2016.
- 11 O’Cathain A, Croot L, Duncan E, *et al.* Guidance on how to develop complex interventions to improve health and healthcare. *BMJ Open* 2019;**9**:e029954. doi:10.1136/bmjopen-2019-029954
- 12 Williams O, Sarre S, Papoulias SC, *et al.* Lost in the shadows: reflections on the dark side of co-production. *Heal. Res. policy Syst.* 2020;**18**:43. doi:10.1186/s12961-020-00558-0
- 13 Jagosh J, Macaulay AC, Pluye P, *et al.* Uncovering the Benefits of Participatory Research: Implications of a Realist Review for Health Research and Practice. *Milbank Q* 2012;**90**:311–46. doi:10.1111/j.1468-0009.2012.00665.x
- 14 Abimbola S. Beyond positive a priori bias: reframing community engagement in LMICs. *Health Promot Int* 2020;**35**:598–609. doi:10.1093/heapro/daz023
- 15 Luna F, Luyckx VA. Why have Non-communicable Diseases been Left Behind? *Asian Bioeth Rev* 2020;**12**:5–25. doi:10.1007/s41649-020-00112-8
- 16 Jagosh J, Bush PL, Salsberg J, *et al.* A realist evaluation of community-based



- 1  
2  
3 participatory research: Partnership synergy, trust building and related ripple effects. *BMC Public Health* 2015;**15**:725. doi:10.1186/s12889-015-1949-1
- 4  
5  
6 17 Waddell CM, Herron R V, Gobeil J, *et al*. Grounded in Culture: Reflections on Sitting  
7 Outside the Circle in Community-Based Research With Indigenous Men. *Qual Health*  
8 *Res* 2020;**30**:2343–50. doi:10.1177/1049732320960050
- 9  
10 18 Nyirenda D, Sariola S, Kingori P, *et al*. Structural coercion in the context of community  
11 engagement in global health research conducted in a low resource setting in Africa.  
12 *BMC Med Ethics* 2020;**21**:90. doi:10.1186/s12910-020-00530-1
- 13  
14 19 Bird-Naytowhow K, Hatala AR, Pearl T, *et al*. Ceremonies of Relationship: Engaging  
15 Urban Indigenous Youth in Community-Based Research. *Int J Qual Methods* 2017;**16**.  
16 doi:10.1177/1609406917707899
- 17  
18 20 Burgess RA, Jain S, Petersen I, *et al*. Social interventions: a new era for global mental  
19 health? *The Lancet Psychiatry*. 2020;**7**:118–9. doi:10.1016/S2215-0366(19)30397-9
- 20  
21 21 Campbell C, Burgess R. The role of communities in advancing the goals of the  
22 Movement for Global Mental Health. *Transcult Psychiatry* 2012;**49**:379–95.  
23 doi:10.1177/1363461512454643
- 24  
25 22 De Weger E, Van Vooren NJE, Drewes HW, *et al*. Searching for new community  
26 engagement approaches in the Netherlands: A realist qualitative study. *BMC Public*  
27 *Health* 2020;**20**:508. doi:10.1186/s12889-020-08616-6
- 28  
29 23 Sambiéni NE. Differences and structural weaknesses of institutional mechanisms for  
30 health research ethics: Burkina Faso, Palestine, Peru, and Democratic Republic of the  
31 Congo. *BMC Med Ethics* 2018;**19**:47. doi:10.1186/s12910-018-0284-3
- 32  
33 24 Roth GA, Abate D, Abate KH, *et al*. Global, regional, and national age-sex-specific  
34 mortality for 282 causes of death in 195 countries and territories, 1980–2017: a  
35 systematic analysis for the Global Burden of Disease Study 2017. *Lancet*  
36 2018;**392**:1736–88. doi:10.1016/S0140-6736(18)32203-7
- 37  
38 25 Gouda HN, Charlson F, Sorsdahl K, *et al*. Burden of non-communicable diseases in  
39 sub-Saharan Africa, 1990-2017: results from the Global Burden of Disease Study  
40 2017. *Lancet Glob Heal* 2019;**7**:e1375–87. doi:10.1016/S2214-109X(19)30374-2
- 41  
42 26 Allotey P, Davey T, Reidpath DD. NCDs in low and middle-income countries -  
43 assessing the capacity of health systems to respond to population needs. *BMC Public*  
44 *Health* 2014;**14 Suppl 2**:S1. doi:10.1186/1471-2458-14-S2-S1
- 45  
46 27 Bosire E, Mendenhall E, Omondi GB, *et al*. When Diabetes Confronts HIV: Biological  
47 Sub-citizenship at a Public Hospital in Nairobi, Kenya. *Med Anthropol Q* 2018;**32**:574–  
48 92. doi:10.1111/maq.12476
- 49  
50 28 World Health Organization. WHO EMRO Health promotion and disease prevention  
51 through population-based interventions, including action to address social  
52 determinants and health inequity. 2021. [http://www.emro.who.int/about-who/public-](http://www.emro.who.int/about-who/public-health-functions/health-promotion-disease-prevention.html)  
53 [health-functions/health-promotion-disease-prevention.html](http://www.emro.who.int/about-who/public-health-functions/health-promotion-disease-prevention.html) (accessed 3 Feb 2021).
- 54  
55 29 Lynch HM, Green AS, Clarke Nanyonga R, *et al*. Exploring patient experiences with  
56 and attitudes towards hypertension at a private hospital in Uganda: A qualitative study.  
57 *Int J Equity Health* 2019;**18**:206. doi:10.1186/s12939-019-1109-9
- 58  
59 30 Ware LJ, Pioreschi A, Bosire E, *et al*. Environmental, Social, and Structural  
60 Constraints for Health Behavior: Perceptions of Young Urban Black Women During  
the Preconception Period-A Healthy Life Trajectories Initiative. *J Nutr Educ Behav*  
2019;**51**:946–57. doi:10.1016/j.jneb.2019.04.009

- 1  
2  
3 31 Draper CE, Bosire E, Prioreshi A, *et al.* Urban young women's preferences for  
4 intervention strategies to promote physical and mental health preconception: A  
5 Healthy Life Trajectories Initiative (HeLTI). *Prev Med Reports* 2019;**14**.  
6 doi:10.1016/j.pmedr.2019.100846  
7
- 8 32 Draper C, Ware L, Prioreshi A, *et al.* "Honestly speaking, it's the..." money: pilot  
9 implementation of a preconception health trial in South Africa. (forthcoming, in review).  
10 *SAGE Open Med*  
11
- 12 33 Morrison J, Akter K, Jennings HM, *et al.* Participatory learning and action to address  
13 type 2 diabetes in rural Bangladesh: A qualitative process evaluation. *BMC Endocr*  
14 *Disord* 2019;**19**:118. doi:10.1186/s12902-019-0447-3  
15
- 16 34 Mannell J, Davis K, Akter K, *et al.* Visual Participatory Analysis: A Qualitative Method  
17 for Engaging Participants in Interpreting the Results of Randomized Controlled Trials  
18 of Health Interventions. *J Mix Methods Res* 2020;:155868982091480.  
19 doi:10.1177/1558689820914806  
20
- 21 35 Fottrell E, Ahmed N, Morrison J, *et al.* Community groups or mobile phone messaging  
22 to prevent and control type 2 diabetes and intermediate hyperglycaemia in  
23 Bangladesh (DMagic): a cluster-randomised controlled trial. *Lancet Diabetes*  
24 *Endocrinol* 2019;**7**:200–12. doi:10.1016/S2213-8587(19)30001-4  
25
- 26 36 Chibanda D, Mesu P, Kajawu L, *et al.* Problem-solving therapy for depression and  
27 common mental disorders in Zimbabwe: Piloting a task-shifting primary mental health  
28 care intervention in a population with a high prevalence of people living with HIV. *BMC*  
29 *Public Health* 2011;**11**:828. doi:10.1186/1471-2458-11-828  
30
- 31 37 Chibanda D, Weiss HA, Verhey R, *et al.* Effect of a primary care-based psychological  
32 intervention on symptoms of common mental disorders in Zimbabwe: A randomized  
33 clinical trial. *JAMA - J Am Med Assoc* 2016;**316**:2618–26.  
34 doi:10.1001/jama.2016.19102  
35
- 36 38 NCD Alliance. Our Views, Our Voices. 2021. [https://ncdalliance.org/what-we-](https://ncdalliance.org/what-we-do/capacity-development/our-views-our-voices)  
37 [do/capacity-development/our-views-our-voices](https://ncdalliance.org/what-we-do/capacity-development/our-views-our-voices) (accessed 19 Feb 2021).  
38
- 39 39 Mukumbang FC. *A realist evaluation of the antiretroviral treatment adherence club*  
40 *programme in the metropolitan area of the Western Cape Province, South Africa.*  
41 2018.  
42
- 43 40 Bhaskar R. *A realist theory of science.* Routledge/Taylor & Francis Group 2008.  
44
- 45 41 Mukumbang FC, van Wyk B. Leveraging the Photovoice Methodology for Critical  
46 Realist Theorizing. *Int J Qual Methods* 2020;**19**:160940692095898.  
47 doi:10.1177/1609406920958981  
48
- 49 42 de Souza DE. Culture, context and society - The underexplored potential of critical  
50 realism as a philosophical framework for theory and practice. *Asian J Soc Psychol*  
51 2014;**17**:141–51. doi:10.1111/ajsp.12052  
52
- 53 43 Wong G, Greenhalgh T, Westhorp G, *et al.* RAMESES publication standards: Realist  
54 syntheses. *BMC Med* 2013;**11**:21. doi:10.1186/1741-7015-11-21  
55
- 56 44 Pawson R, Greenhalgh T, Harvey G, *et al.* Realist review - A new method of  
57 systematic review designed for complex policy interventions. *J. Heal. Serv. Res.*  
58 *Policy.* 2005;**10**:21–34. doi:10.1258/1355819054308530  
59
- 60 45 Jagosh J. Realist Synthesis for Public Health: Building an Ontologically Deep  
Understanding of How Programs Work, For Whom, and In Which Contexts. *Annu Rev*  
*Public Health* 2019;**40**:361–72. doi:10.1146/annurev-publhealth-031816-044451

- 1  
2  
3 46 De Weger E, Van Vooren NJE, Wong G, *et al.* What's in a Realist Configuration? Deciding Which Causal Configurations to Use, How, and Why. *Int J Qual Methods* 2020;**19**:160940692093857. doi:10.1177/1609406920938577
- 6  
7 47 Bhaskar R. Forms of realism. *Philosophica* 1975;**15**:99–127.
- 8  
9 48 Mukumbang FC, Marchal B, Van Belle S, *et al.* A realist approach to eliciting the initial programme theory of the antiretroviral treatment adherence club intervention in the Western Cape Province, South Africa. *BMC Med Res Methodol* 2018;**18**:47. doi:10.1186/s12874-018-0503-0
- 12  
13 49 Wong G, Greenhalgh T, Westhorp G, *et al.* RAMESES publication standards: Meta-narrative reviews. *BMC Med* 2013;**11**:20. doi:10.1186/1741-7015-11-20
- 16  
17 50 Caswell RJ, Maidment I, Ross JDC, *et al.* How, why, for whom and in what context, do sexual health clinics provide an environment for safe and supported disclosure of sexual violence: Protocol for a realist review. *BMJ Open*. 2020;**10**. doi:10.1136/bmjopen-2020-037599
- 20  
21 51 Abrams R, Wong G, Mahtani KR, *et al.* Understanding the impact of delegated home visiting services accessed via general practice by community-dwelling patients: A realist review protocol. *BMJ Open* 2018;**8**:24876. doi:10.1136/bmjopen-2018-024876
- 24  
25 52 Duddy C, Wong G. Explaining variations in test ordering in primary care: protocol for a realist review. *BMJ Open*. 2018;**8**:e023117. doi:10.1136/bmjopen-2018-023117
- 27  
28 53 Greenhalgh T, Thorne S, Malterud K. Time to challenge the spurious hierarchy of systematic over narrative reviews? *Eur J Clin Invest* 2018;**48**:e12931. doi:10.1111/eci.12931
- 30  
31 54 Bates MJ. The design of browsing and berrypicking techniques for the online search interface. *Online Inf. Rev.* 1989;**13**:407–24. doi:10.1108/eb024320
- 34  
35 55 Jagosh J. Retroductive theorizing in Pawson and Tilley's applied scientific realism. *J Crit Realis* 2020;**19**:121–30. doi:10.1080/14767430.2020.1723301
- 36  
37 56 Wong G, Westhorp G, Pawson R, *et al.* Realist synthesis RAMESES training materials. 2013.
- 39  
40 57 Tyndall J. AACODS Checklist. 2010. [https://dspace.flinders.edu.au/xmlui/bitstream/handle/2328/3326/AACODS\\_Checklist.pdf;jsessionid=67E9E0E44805CE646B50C475C7ACD013?sequence=4](https://dspace.flinders.edu.au/xmlui/bitstream/handle/2328/3326/AACODS_Checklist.pdf;jsessionid=67E9E0E44805CE646B50C475C7ACD013?sequence=4) (accessed 19 Feb 2021).
- 44  
45 58 Adams J, Hillier-Brown FC, Moore HJ, *et al.* Searching and synthesising 'grey literature' and 'grey information' in public health: Critical reflections on three case studies. *Syst Rev* 2016;**5**:164. doi:10.1186/s13643-016-0337-y
- 48  
49 59 Mukumbang FC, Marchal B, Van Belle S, *et al.* Using the realist interview approach to maintain theoretical awareness in realist studies. *Qual Res* 2020;**20**:485–515. doi:10.1177/1468794119881985
- 52  
53  
54  
55  
56  
57  
58  
59  
60

### Authors' contributions

SK conceptualised the study with input from FCM, CED and BA. SK designed and drafted the review protocol. FCM, BA, CED, ENB, PT and DN contributed to protocol development. FCM and BA provided methodological guidance. BA and SK developed initial programme theories with input from other authors and stakeholders. BA, CED, FCM, ENB, PT and DN critically reviewed and edited the manuscript. All authors read and approved the final manuscript.

### Funding

The work of SK was supported by Koneen Säätiö (grant number 201901846).

### Conflict of interest

None to declare.

### Acknowledgements

The authors would like to thank all colleagues and stakeholders who have contributed time and feedback to this review protocol during globally challenging times. Eleanor Winpenny's initial inspiration for adopting a realist review approach is gratefully acknowledged.

### Figure titles

Figure 1 The role of community engagement in health interventions

Figure 2 Realist review process and cross-cutting principles[43–45,49]

Figure 3 Initial theories: potential community engagement trajectories in health research and interventions[8,13,16–18,45]

1  
2  
3  
4  
5  
6  
7  
8  
9  
10  
11  
12  
13  
14  
15  
16  
17  
18  
19  
20  
21  
22  
23  
24  
25  
26  
27  
28  
29  
30  
31  
32  
33  
34  
35  
36  
37  
38  
39  
40  
41  
42  
43  
44  
45  
46  
47  
48  
49  
50  
51  
52  
53  
54  
55  
56  
57  
58  
59  
60

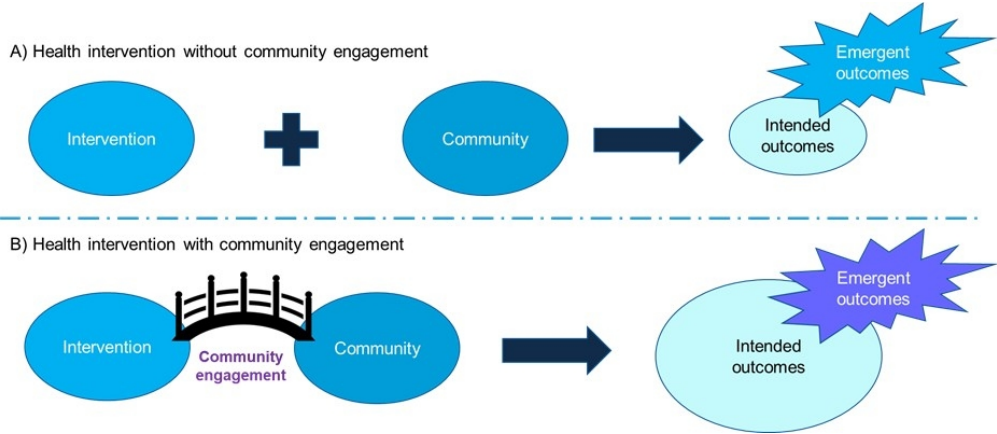

Figure 1 The role of community engagement in health interventions

157x67mm (150 x 150 DPI)

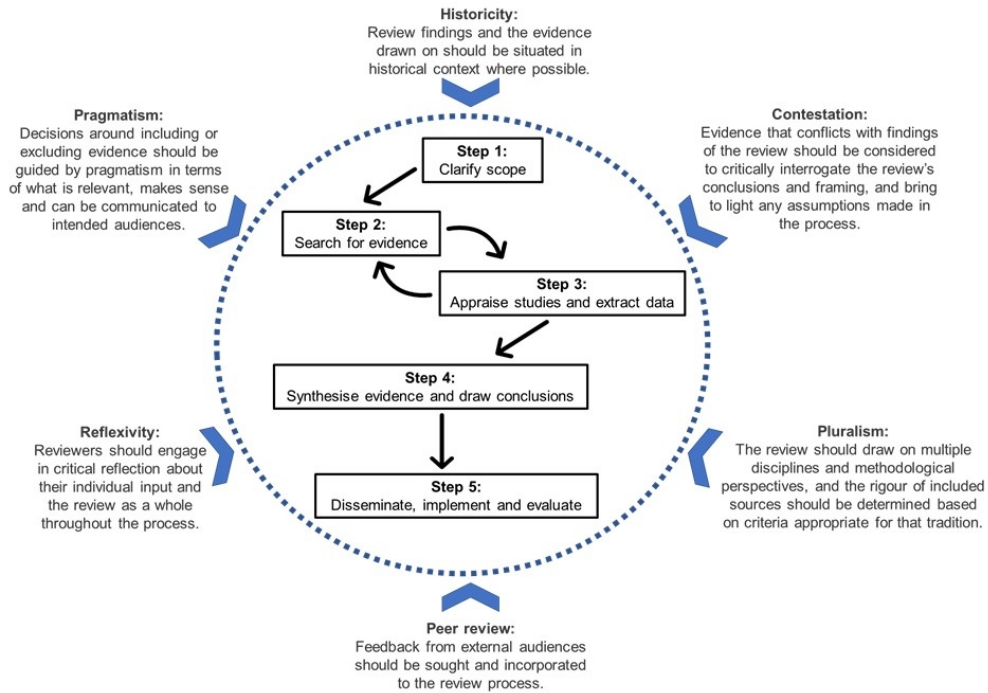

Figure 2 Realist review process and cross-cutting principles[43–45,49]

160x112mm (150 x 150 DPI)

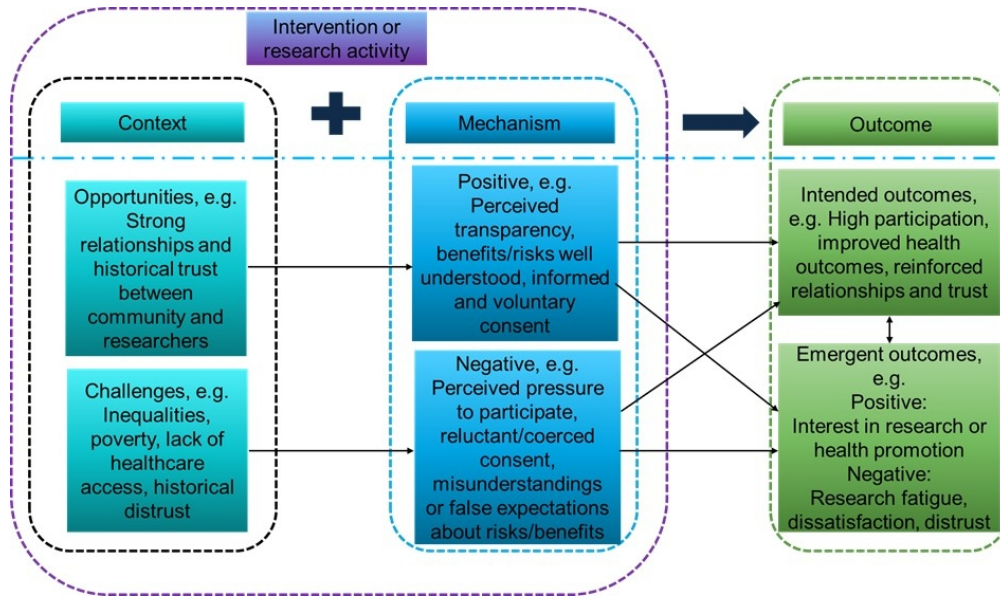

Figure 3 Initial theories: potential community engagement trajectories in health research and interventions[8,13,16–18,45]

160x94mm (150 x 150 DPI)

# BMJ Open

## Engaging communities in non-communicable disease research and interventions in low- and middle-income countries: a realist review protocol

|                                 |                                                                                                                                                                                                                                                                                                                                                                                                                                                                                                                                                                                                                                                                                                                                                                                                                                                                                                                                |
|---------------------------------|--------------------------------------------------------------------------------------------------------------------------------------------------------------------------------------------------------------------------------------------------------------------------------------------------------------------------------------------------------------------------------------------------------------------------------------------------------------------------------------------------------------------------------------------------------------------------------------------------------------------------------------------------------------------------------------------------------------------------------------------------------------------------------------------------------------------------------------------------------------------------------------------------------------------------------|
| Journal:                        | <i>BMJ Open</i>                                                                                                                                                                                                                                                                                                                                                                                                                                                                                                                                                                                                                                                                                                                                                                                                                                                                                                                |
| Manuscript ID                   | bmjopen-2021-050632.R1                                                                                                                                                                                                                                                                                                                                                                                                                                                                                                                                                                                                                                                                                                                                                                                                                                                                                                         |
| Article Type:                   | Protocol                                                                                                                                                                                                                                                                                                                                                                                                                                                                                                                                                                                                                                                                                                                                                                                                                                                                                                                       |
| Date Submitted by the Author:   | 24-May-2021                                                                                                                                                                                                                                                                                                                                                                                                                                                                                                                                                                                                                                                                                                                                                                                                                                                                                                                    |
| Complete List of Authors:       | Klingberg, Sonja; University of the Witwatersrand Faculty of Health Sciences, SAMRC/Wits Developmental Pathways for Health Research Unit (DPHRU)<br>Adhikari, Bipin; Mahidol University, Mahidol-Oxford Tropical Medicine Research Unit, Faculty of Tropical Medicine; University of Oxford, Centre for Tropical Medicine and Global Health, Nuffield Department of Medicine<br>Draper, Catherine; University of the Witwatersrand, SAMRC/Wits Developmental Pathways for Health Research Unit (DPHRU)<br>Bosire, Edna; University of the Witwatersrand Faculty of Health Sciences, SAMRC/Wits Developmental Pathways for Health Research Unit (DPHRU)<br>Tiigah, Priscilla; Independent researcher<br>Nyirenda, Deborah; University of Malawi, Community Engagement and Bioethics, Malawi-Liverpool-Wellcome Trust Clinical Research Programme<br>Mukumbang, Ferdinand; University of Washington, Department of Global Health |
| <b>Primary Subject Heading</b>: | Global health                                                                                                                                                                                                                                                                                                                                                                                                                                                                                                                                                                                                                                                                                                                                                                                                                                                                                                                  |
| Secondary Subject Heading:      | Ethics, Public health, Research methods                                                                                                                                                                                                                                                                                                                                                                                                                                                                                                                                                                                                                                                                                                                                                                                                                                                                                        |
| Keywords:                       | PUBLIC HEALTH, ETHICS (see Medical Ethics), PREVENTIVE MEDICINE                                                                                                                                                                                                                                                                                                                                                                                                                                                                                                                                                                                                                                                                                                                                                                                                                                                                |
|                                 |                                                                                                                                                                                                                                                                                                                                                                                                                                                                                                                                                                                                                                                                                                                                                                                                                                                                                                                                |

SCHOLARONE™  
Manuscripts





I, the Submitting Author has the right to grant and does grant on behalf of all authors of the Work (as defined in the below author licence), an exclusive licence and/or a non-exclusive licence for contributions from authors who are: i) UK Crown employees; ii) where BMJ has agreed a CC-BY licence shall apply, and/or iii) in accordance with the terms applicable for US Federal Government officers or employees acting as part of their official duties; on a worldwide, perpetual, irrevocable, royalty-free basis to BMJ Publishing Group Ltd ("BMJ") its licensees and where the relevant Journal is co-owned by BMJ to the co-owners of the Journal, to publish the Work in this journal and any other BMJ products and to exploit all rights, as set out in our [licence](#).

The Submitting Author accepts and understands that any supply made under these terms is made by BMJ to the Submitting Author unless you are acting as an employee on behalf of your employer or a postgraduate student of an affiliated institution which is paying any applicable article publishing charge ("APC") for Open Access articles. Where the Submitting Author wishes to make the Work available on an Open Access basis (and intends to pay the relevant APC), the terms of reuse of such Open Access shall be governed by a Creative Commons licence – details of these licences and which [Creative Commons](#) licence will apply to this Work are set out in our licence referred to above.

Other than as permitted in any relevant BMJ Author's Self Archiving Policies, I confirm this Work has not been accepted for publication elsewhere, is not being considered for publication elsewhere and does not duplicate material already published. I confirm all authors consent to publication of this Work and authorise the granting of this licence.

**TITLE:**

**Engaging communities in non-communicable disease research and interventions in low- and middle-income countries: a realist review protocol**

**AUTHORS:**

**Sonja Klingberg (corresponding author, ORCID: 0000-0002-9330-7102)**

SAMRC/Wits Developmental Pathways for Health Research Unit (DPHRU)

Faculty of Health Sciences

University of the Witwatersrand

Private Bag X3

Wits, Johannesburg 2050

South Africa

[sonja.klingberg@wits.ac.za](mailto:sonja.klingberg@wits.ac.za)

**Bipin Adhikari (ORCID: 0000-0001-8981-3910)**

Mahidol-Oxford Tropical Medicine Research Unit

Faculty of Tropical Medicine

Mahidol University

Bangkok

Thailand

and

Centre for Tropical Medicine and Global Health

Nuffield Department of Medicine

University of Oxford

Oxford

UK

**Catherine E. Draper (ORCID: 0000-0002-2885-437X)**

SAMRC/Wits Developmental Pathways for Health Research Unit (DPHRU)

Faculty of Health Sciences

University of the Witwatersrand

Johannesburg

South Africa

**Edna N. Bosire (ORCID: 0000-0002-4781-7101)**

SAMRC/Wits Developmental Pathways for Health Research Unit (DPHRU)

Faculty of Health Sciences

University of the Witwatersrand

Johannesburg

South Africa

**Priscilla Tiigah**

Independent researcher

London

UK

1  
2  
3 **Deborah Nyirenda (ORCID: 0000-0002-5867-4687)**

4 Community Engagement and Bioethics

5 Malawi-Liverpool-Wellcome Trust Clinical Research Programme

6 Blantyre

7 Malawi

8  
9  
10 **Ferdinand C. Mukumbang (ORCID: 0000-0003-1441-2172)**

11 Department of Global Health

12 University of Washington

13 Seattle

14 USA

15  
16  
17  
18 **Word count:**

19 **3733/4000**

20  
21  
22  
23 **Keywords:**

24 **Community engagement; non-communicable diseases; low- and middle-income**  
25 **countries; realist review; critical realism**  
26  
27  
28  
29  
30  
31  
32  
33  
34  
35  
36  
37  
38  
39  
40  
41  
42  
43  
44  
45  
46  
47  
48  
49  
50  
51  
52  
53  
54  
55  
56  
57  
58  
59  
60

## ABSTRACT

### Introduction

Engaging communities and intended beneficiaries at various stages of health research is a recommended practice. The contribution of community engagement to non-communicable disease research in low- and middle-income countries has not yet been extensively studied or synthesised. This protocol describes the steps towards generating an understanding of community engagement in the context of non-communicable disease research, prevention and health promotion using a realist review approach. A realist lens enables a rich explanatory approach to causation while capturing complexity, and an openness to multiple outcomes, including unintended consequences. The review will thus develop an understanding of community engagement without assuming that such practices result in more ethical research or effective interventions.

### Methods and analysis

We propose a realist approach aiming to examine how, why, under what circumstances, and for whom, community engagement works or does not work. The iterative review steps include clarifying the review scope; searching for evidence; appraising studies and extracting data; synthesising evidence and drawing conclusions; and disseminating, implementing and evaluating the findings. Principles of meta-narrative review (pragmatism, pluralism, historicity, contestation, reflexivity and peer review) are employed to ensure practicable and contextualised review outputs. The proposed review will draw on theoretical and empirical literature beyond specific diseases or settings, but with a focus on informing non-communicable disease research and interventions in low- and middle-income countries. The synthesis of existing literature will be complemented by qualitative realist interviews and stakeholder consultation. Through drawing on multiple types of evidence and input from both experts and intended beneficiaries, the review will provide critical and pragmatic insights for research and community engagement in low- and middle-income countries.

### Ethics and dissemination

Ethical approval has been obtained from the University of the Witwatersrand. Dissemination will include traditional academic channels, institutional communications, social media and discussions with a wide range of stakeholders.

(299/300 words)

## ARTICLE SUMMARY

### Strengths and limitations of this study

- The realist review approach adopted will provide novel explanatory evidence, transcending mere descriptions to unearth what mechanisms and contextual elements are at play to achieve meaningful community engagement with non-communicable disease research in low- and middle-income countries.
- The review will integrate information obtained from multiple sources to develop robust explanatory models on the specifics of interventions around non-communicable diseases.
- The protocol draws on the meta-narrative review principles of pragmatism, pluralism, historicity, contestation, reflexivity and peer review to ensure a rich and rigorous synthesis despite a paucity of specific evidence from low- and middle-income countries.
- Effective stakeholder engagement with a diverse range of stakeholders is somewhat limited by the COVID-19 pandemic.

## INTRODUCTION

### Community engagement

The concept and practices of community engagement can be traced back to the pursuit of participatory approaches in scientific research from the 1960s onwards, particularly in the fields of global health and international development.[1] In the context of health research, community engagement can be viewed as a strategy for building and maintaining “relationships between researchers and the stakeholder community — the unique collection of diverse stakeholders who have interests in the conduct and/or outcomes of a given research project”. [2] Community engagement is, however, used to refer to a multitude of practices, and the concept is somewhat ambiguous when it comes to both terms, ‘community’ and ‘engagement’. [3–5] Communities can, for example, consist of intended beneficiaries, residents of a particular geographical area, or a group of individuals with shared interests or connected identities. However, researchers and the perceived communities may have rather different understandings of what constitutes a community, and who belongs to it. [6] Engagement can mean: minimal outreach with limited involvement from stakeholders, mostly with the purpose of providing them information about the research; consultation with some input from stakeholders to researchers; stakeholder and participant involvement at different stages of research; different forms of collaboration; and, most comprehensively, shared leadership with a strong bidirectional relationship between stakeholders and researchers. [7] In practice, the involvement of non-academic stakeholders through practices such as community engagement or participatory methods plays an important role in public health research and interventions; and large funding bodies are increasingly emphasising community or public engagement when awarding grants for large trials. [2, 7–9]

Guidance for developing and evaluating complex public health interventions recommends involving intended beneficiaries and other relevant stakeholders throughout the process. [10, 11] Approaches such as co-design or co-production are gaining popularity, at least within the jargon used to describe intervention research. [12] While there are many ethical and practical reasons [13] to promote the participation of community members and stakeholders in different phases of research, intervention development, implementation and dissemination, there are also numerous reasons for individuals or communities to not want to engage with research either as participants or in advisory roles. Moreover, those individuals or groups who do participate actively in shaping research questions or guiding intervention design bring with them their own agendas, which may or may not align with other intended outcomes of research and interventions.

In recognition of this complexity, Abimbola [14] calls for a move beyond a positive *a priori* bias in favour of community engagement, which typically involves assumptions that people want to participate in decision-making about their health, and that community engagement will generally lead to favourable outcomes. These assumptions are particularly important to question in the context of non-communicable disease (NCD) prevention, which is less visibly characterised by civil society activism and community-led responses than, for example, HIV/AIDS [15, 16]. Indeed, although NCDs are the leading causes of morbidity and mortality worldwide, and increasingly so in low- and middle-income countries (LMICs), the prevention of NCDs has tended to be deprioritised vis-à-vis problems perceived as more acute and urgent. [17]

1  
2  
3 Previous research on community engagement and participatory research approaches  
4 indicate that trust and power-sharing between researchers and communities,[18,19] and  
5 expected or tangible benefits received by the community,[20] play a role in contributing  
6 towards how appealing engagement is from the point of view of potential participants and  
7 targeted communities. Furthermore, factors such as resource constraints, varying levels of  
8 education, existing inequalities, historical tensions, or even a history of harm done under the  
9 guise of public health research, are bound to influence people's willingness and ability to  
10 engage with research or interventions.[14,19–21] It is, therefore, important to examine how  
11 different approaches to community engagement, from purely researcher-led to more  
12 community-centred or transformative practices with more power-sharing, may have different  
13 outcomes in terms of ethics, effectiveness, scalability and sustainability.[7,22–24]

14  
15  
16  
17 As described by Adhikari and colleagues,[3] the goals of community engagement in health  
18 research can broadly be divided into research-related and ethical outcomes, although there  
19 are notably also overlaps between these categories. For example, enhancing participant  
20 recruitment and ensuring retention are predominantly research-related goals of community  
21 engagement, while supporting the consent process can be seen as both an ethical and a  
22 research-related goal. In practice, without deliberate effort,[2] even the ethical goals of  
23 community engagement, such as minimising risks, burdens and exploitation may not go  
24 much beyond institutional demands for research ethics, which do not necessarily capture  
25 community interests beyond minimising obvious harms.[25] Indeed, it is important to  
26 acknowledge that community engagement itself can be harmful or contribute to harmful  
27 research.[20] This review will, therefore, explore an understanding of the contexts and  
28 mechanisms that can produce harmful outcomes, and those that can protect participants and  
29 communities from harm.  
30  
31  
32  
33  
34

### 35 **NCD prevention and community engagement in LMICs**

36  
37 NCDs comprise a huge variety of diseases and conditions to which over 70% of the global  
38 burden of mortality can be attributed.[26] Globally, a vast majority of NCD-related deaths  
39 occur in LMICs that are seeing a shift from predominantly communicable diseases and  
40 childhood illnesses to a disease burden characterised mostly by NCDs.[27] An increased  
41 focus on NCD prevention, management and treatment has been seen in both research and  
42 policy, but funding priorities still often reflect a focus on specific communicable  
43 diseases.[28,29]

44  
45  
46 If health promotion is seen as “the process of empowering people to increase control over  
47 their health and its determinants”,[30] community engagement and participatory approaches  
48 are suitable elements for research that aims to prevent NCDs and promote health. However,  
49 due to the prevailing perceptions in many settings that NCDs are ‘lifestyle’ illnesses, non-  
50 urgent or self-inflicted,[17] and the often relatively asymptomatic nature of some NCDs such  
51 as hypertension,[31] it can be expected that interest for engaging with NCD prevention  
52 efforts may be limited among communities affected by NCDs. Indeed, qualitative evidence  
53 from South Africa suggests that the immediacy of concerns such as unemployment, safety  
54 and food insecurity understandably mean that potential future health outcomes are low on  
55 many people's agendas, and ‘health and its determinants’ are not under individuals' control  
56 due to socio-economic and structural constraints.[32–34]

1  
2  
3 Nevertheless, there are also examples of successful engagement of communities in  
4 addressing NCDs in LMIC settings. A community-based diabetes prevention trial in  
5 Bangladesh found participatory learning and action groups to be an effective intervention to  
6 prevent type 2 diabetes, while also utilising methods such as participatory visual analysis to  
7 engage participants in interpreting the results of the trial.[35–37] Similarly, a successful  
8 community-based mental health intervention called the ‘Friendship Bench’ was developed in  
9 Zimbabwe following community stakeholders’ call for an intervention.[38,39] Globally, civil  
10 society actors play a pivotal role in involving community voices and the lived experience of  
11 people with NCDs in campaigns and advocacy demanding government action on NCDs.[40]

12  
13  
14 For the purposes of this review, community engagement is conceptualised as a part of NCD  
15 research or interventions rather than an intervention or programme on its own. Research or  
16 interventions can take place without community engagement, and communities can carry out  
17 activities without any connection to research or interventions. In this sense, community  
18 engagement can be viewed as a bridge that connects research or interventions to a  
19 community. As illustrated in Figure 1, community-based interventions without community  
20 engagement (1A) can have both intended and emergent outcomes. With community  
21 engagement (1B), the same is true, but the range of different potential outcomes may be  
22 wider due to the added element of community engagement.

23  
24  
25  
26 [Figure 1 here]

### 27 28 29 30 **Critical realism and realist reviews**

31  
32 Critical realism is a philosophy of science that draws on elements of positivist and  
33 interpretivist paradigms to propose an understanding of social activity whereby both social  
34 structure (an organised set of social institutions and patterns of institutionalised relationships)  
35 and agency (thoughts and actions taken by people) find a place.[41,42] Critical realism as a  
36 research paradigm involves a multi-layered view of reality, hypothesising the existence of  
37 mechanisms – underlying entities that can cause an event to occur – that produce social  
38 events, whether these are observed or not.[43] Realist methodology, building on critical  
39 realism through an interpretation originally referred to as scientific realism,[44] is increasingly  
40 used to evaluate public health interventions while maintaining an openness to both intended  
41 and unintended outcomes. It enables in-depth analyses of different causal mechanisms at  
42 play in generating those outcomes and *in tandem* consideration of contextual elements that  
43 (dis)activate these mechanisms.[45]

44  
45  
46  
47 While more traditional reviews of public health interventions, especially systematic reviews,  
48 tend to be concerned with the effectiveness of said interventions in achieving intended and  
49 clearly specified outcomes, realist reviews combine theory and empirical observations to  
50 uncover how, why and for whom such interventions work or not by adopting an explicit  
51 explanatory approach.[46–48] The key outputs of realist reviews are, therefore, theories and  
52 models of generative causation, often captured by a heuristic that explain how entities such  
53 as contexts and mechanisms interact in different ways to produce different intended or  
54 emergent (unintended) outcomes. The functioning of contexts and mechanisms in ways that  
55 produce outcomes is captured by configurations referred to as CMO configurations. These  
56 concepts, and other central terms used in this review protocol, are defined in Table 1. While  
57 realist-informed research may also make use of other explanatory factors,[49] such as  
58  
59  
60



1  
2  
3 interventions and actors, as part of heuristic configurations, the starting point for the  
4 proposed review is to utilise CMO configurations as it provides sufficient explanatory depth  
5 and coherence. Other elements may be introduced if the review process seems to require it  
6 for clarity and to enhance realist causal explanations in a way that can, for example,  
7 disentangle agency from structure.[50]  
8  
9  
10  
11  
12  
13

14 **Table 1 Key concepts**

| 15 Concept            | 16 Definition                                                                                                                                                                                                                                                                                                                                                                                                                                                                                                                                                                                                                                                                                                      |
|-----------------------|--------------------------------------------------------------------------------------------------------------------------------------------------------------------------------------------------------------------------------------------------------------------------------------------------------------------------------------------------------------------------------------------------------------------------------------------------------------------------------------------------------------------------------------------------------------------------------------------------------------------------------------------------------------------------------------------------------------------|
| 17 Critical realism   | 18 A philosophical framework that combines positivist (the paradigm<br>19 underpinning natural sciences) and interpretivist (a paradigm that<br>20 emphasises experiences and interpretations over the 'objective' truth<br>21 assumed by positivism) understandings of the world.[51] Of<br>22 particular relevance to realist research is the concept of ontological<br>23 depth,[48] depicting a stratified reality with three layers: the empirical<br>24 (things and events that are observed); the actual (things that exist<br>25 and events that occur but are not observed); and, the real<br>26 (mechanisms that are not directly observable but can potentially<br>27 cause events to occur).[42,51,52] |
| 29 Scientific realism | 30 An approach to theory development and testing that draws on critical<br>31 realism, and makes use of realist concepts and methods, such as<br>32 retrodution.[44] This is the original framework underpinning realist<br>33 evaluation and reviews,[44,53] but applications of scientific realism<br>34 and interpretations of the relationship between scientific and critical<br>35 realism are varied and contested in the field of realist evaluation.[50]                                                                                                                                                                                                                                                  |
| 36 Realist review     | 37 A theory-driven and iterative approach to reviewing and synthesising<br>38 literature in order to provide an explanation of how, why, for whom<br>39 and under what circumstances programmes, policies and<br>40 interventions work or do not work.[46,47]                                                                                                                                                                                                                                                                                                                                                                                                                                                      |
| 41 Programme theory   | 42 Theories that link activities and outcomes to explain how and why a<br>43 change is expected to take place, representing how the mechanisms<br>44 introduced into pre-existing contexts can generate outcomes.[47,54]                                                                                                                                                                                                                                                                                                                                                                                                                                                                                           |
| 45 Context (C)        | 46 The conditions (e.g. individual, organisational and environmental<br>47 features), historical elements or relational and dynamic features that<br>48 can potentially (dis)activate existing or introduced<br>49 mechanisms.[47,48,55]                                                                                                                                                                                                                                                                                                                                                                                                                                                                           |
| 50 Mechanism (M)      | 51 An underlying entity that produces specific outcomes in specific<br>52 contexts. Mechanisms are a combination of resources (e.g.<br>53 components of an intervention) and responses (e.g. the perceptions<br>54 of participants) highlighting the importance of examining how<br>55 interventions are received as opposed to merely considering how<br>56 they are intended.[47,48]                                                                                                                                                                                                                                                                                                                             |
| 57 Outcome (O)        | 58 Expected or actual change achieved by the combination of specific<br>59 contexts and mechanisms.[47,48]<br>60                                                                                                                                                                                                                                                                                                                                                                                                                                                                                                                                                                                                   |

|                                               |                                                                                                                                                                                                                                                                                                                                |
|-----------------------------------------------|--------------------------------------------------------------------------------------------------------------------------------------------------------------------------------------------------------------------------------------------------------------------------------------------------------------------------------|
| Context-mechanism-outcome (CMO) configuration | CMO configurations are representations of a causal relationship between contexts and mechanisms that lead to specific outcomes.[48,49]                                                                                                                                                                                         |
| Community engagement in research              | A strategy for building and maintaining relationships between researchers and the communities the research concerns, or who are intended to benefit from interventions or research findings..[2]                                                                                                                               |
| Participatory research                        | A research approach that involves research participants at different stages of the research process, for example study design, planning and analysis, rather than merely as informants or recipients of an intervention. Many different methods, such as visual participatory analysis, exist under this general approach.[36] |
| Health promotion                              | Health promotion refers to actions and processes that create better conditions for health through, for example, strengthening people's control over their own health and addressing societal determinants of ill-health.[30]                                                                                                   |
| Abductive thinking                            | A form of inventive and intuitive ('hunch-driven') thinking that allows a researcher to creatively imagine, for example, potential mechanisms to be investigated.[44,56]                                                                                                                                                       |
| Retroduction                                  | Theorising and testing of hidden causal mechanisms that have, for example, been imagined through abductive thinking or inductively inferred from descriptions of existing studies.[44,48,56]                                                                                                                                   |
| Counterfactual thinking                       | The consideration and application of contradictory evidence or alternative explanations to an interpretation, such as a CMO configuration, to further test and refine it.[47,57]                                                                                                                                               |

## Aim and objectives

This realist review protocol proposes steps towards generating an understanding of how and why community engagement enhances the benefits (or not) of interventions to facilitate NCD-related research, prevention and health promotion in LMIC settings. More specifically, the objectives of the realist review are:

- 1) To review existing theoretical and empirical literature across disciplines and settings to understand how, why, for whom and in what contexts community engagement and participatory research approaches work or not.
- 2) To situate community engagement and health research in historical perspectives, vis-à-vis bioethics and, for example, legacies of exploitative medical research and other past transgressions, including top-down or irrelevant interventions.
- 3) To inform and formulate recommendations for future research and interventions with a focus on drawing lessons for ethical, community-centred NCD prevention research and health promotion in LMIC settings.

## Context of the review

The need for a realist review stems from current work around NCD prevention and preconception health promotion in South Africa, and a recognition that the pursuit of ethical research informed by community perspectives is challenging when the health topics in question are, understandably, low on intended beneficiaries' agendas. SK and CED are involved in various research initiatives in South Africa, including qualitative research on improving community engagement practices in Soweto. However, the author team and advisors include experiences and perspectives from a range of settings beyond South Africa, helping to ensure that any transferable findings of the review can be drawn on more widely.

Currently, another realist review of community engagement with health research is being conducted by BA and other colleagues with a focus on malaria trials or other communicable disease interventions in LMICs.[8] We are not aware of other realist reviews of community engagement in NCD prevention and health promotion in LMICs, and thus consider our work to be complementary to, rather than a duplication of, existing or ongoing work.

## METHODS AND ANALYSIS

### Study design

The design of this review is based on the realist review process developed by Pawson et al.,[47] RAMESES guidelines[46,58] and recently published realist review protocols.[8,59–61] The realist search and review process is iterative and not as linear or rigid as a traditional systematic review.[62,63] It is, therefore, complex and not fully predictable, with decisions and changes being made along the way as opposed to all criteria and specifications being predefined. In addition to specific guidance for realist reviews, this review also draws on the six cross-cutting principles of meta-narrative reviews: pragmatism, pluralism, historicity, contestation, reflexivity and peer review.[58] Their definitions and roles in the proposed review are summarised in Figure 2. The following sections describe the five planned review steps, as well as progress so far, but it is likely that the exact process will evolve somewhat as the review takes shape.

1  
2  
3 [Figure 2 here]  
4  
5

### 6 **Step 1: Clarify scope**

7  
8 This step involved refining the review focus and purpose through initial informal searches,  
9 discussions, and drawing on existing theoretical and empirical literature. In terms of  
10 identifying literature and developing initial theories, the starting point was finding published  
11 articles on community engagement in NCD prevention in LMICs. This was soon expanded to  
12 include any setting, particularly literature from high-income countries that describes  
13 community engagement or participatory research with Indigenous communities, as this  
14 literature often explicitly grapples with histories of harm inflicted through research.[19,21]  
15 After thorough and iterative discussions about the review aim and objectives, two articles  
16 identified through initial, evolving searches and reading were selected (“berrypicking”[64]) to  
17 elicit the initial theories.[43] The rationale for selection was to allow a consideration of both  
18 beneficial and harmful engagement, and relevance for NCDs, even if not explicitly describing  
19 NCD research or interventions.[19,20] A list of initial theories was first elicited through  
20 abductive thinking and retroductive theorising (see Table 1).[44] This meant considering the  
21 outcomes of research and interventions described in the two selected studies, and “working  
22 backwards” to think about the conditions of reality that are necessary for such effects to  
23 manifest”.[44] The list was developed into a conceptual diagram, and the theories were  
24 further abstracted following discussions within the author team.  
25  
26  
27

28 Based on these phases described under Step 1, Figure 3 illustrates the initial selection of  
29 different salient CMO configurations. The micro theories within the model are potential causal  
30 trajectories, presented from the perspective of participants or community members as the  
31 primary actors. The figure, therefore, captures how their perceptions and experiences  
32 (including past encounters with research or interventions) mediate how new engagement  
33 occurs. This enables the review to remain open to both positive and negative, intended and  
34 emergent, and ethical or other outcomes. For example, historical trust (C) between a  
35 community and researchers can lead to perceived transparency, and information about  
36 research or an intervention to be well received (M), which can lead to outcomes (O) such as  
37 high participation, improved health outcomes, and reinforced relationships and trust between  
38 the community and researchers. The initial exploratory model is not unique to NCDs, and can  
39 thus apply more broadly to health promotion efforts and research that utilise community  
40 engagement. Through later steps of the review, the focus will be to refine the initial  
41 exploratory theory to specifically inform NCD research and interventions.  
42  
43

44 Stakeholder consultation has been initiated through online correspondence with researchers  
45 who are able to give input on the review focus and initial theories based on their experience  
46 and expertise of community engagement or realist research. More comprehensive  
47 stakeholder engagement will be undertaken at later stages.  
48

49 [Figure 3 here]  
50  
51  
52

### 53 **Step 2: Search for evidence**

54  
55 Informed by the first step, a semi-systematic approach to literature searching has been  
56 developed and piloted, and will be implemented by SK. This will involve using combinations  
57 of search terms such as “community engagement”, participatory, “non-communicable  
58 disease”, community-led, “low-income country”, “middle-income country”, LMIC, NCD,  
59 Indigenous, diabetes, hypertension, “blood pressure”, cardiovascular, cancer, chronic,  
60

1  
2  
3 “mental health”, depression, anxiety, intervention, prevention and more in PubMed, Scopus  
4 and Google Scholar, as well as forward and backward reference checking and  
5 recommendations from stakeholders. The search will focus on NCDs to ensure a  
6 manageable scope, but other literature will be included where it can be expected to inform  
7 the review due to potentially similar mechanisms.[65] The initial search strategies are  
8 relatively narrow and targeted (see Supplementary file 1), but further iterations of the  
9 searches (e.g. including search terms such as “Indigenous”), as well as searches targeting  
10 programme theories,[63] will likely be undertaken as the review progresses, and these will be  
11 reported on transparently.  
12  
13

14 Study selection will be purposive, meaning that the review is not expected to represent the  
15 existing evidence base in its entirety, but rather only include what the authors deem relevant  
16 for expanding, refuting, or refining the initial theories. Initial screening of studies based on  
17 title, abstract and keywords will take place simultaneously to the searches. Selected articles  
18 may be NCD-focused studies or accounts of other health research or intervention work, or  
19 any other topic, using any research design, that may feasibly inform community engagement  
20 in NCD research and interventions in LMICs. Out of studies initially identified as potentially  
21 relevant, SK will select studies in consultation with other reviewers.  
22  
23

24 The following inclusion criteria will be utilised:

- 25 ➤ Study design: Any
- 26 ➤ Publication date: Any, with priority given to more recent studies or particularly  
27 influential older studies that have informed later research and practice
- 28 ➤ Document type: Any that can inform the review, including commentaries and practice-  
29 based articles, as long as they come from peer-reviewed journals or reputable and  
30 relevant sources of grey literature[66,67]
- 31 ➤ Population or setting: Any, with priority given to LMICs or Indigenous or other  
32 historically marginalised communities in high-income countries
- 33 ➤ Content: Describes some aspect of community engagement or participatory research  
34 approaches, or provides relevant perspectives and applicable information beyond  
35 these topics even if focusing on communicable diseases or NCD management rather  
36 than prevention
- 37 ➤ Language: English
- 38
- 39
- 40
- 41
- 42

### 43 **Step 3: Appraise studies and extract data**

44 Data extraction and appraisal will be carried out using a template that will be developed and  
45 piloted specifically for this realist review, covering both any data relevant to inform CMO  
46 configurations and study characteristics needed for conducting a quality assessment of each  
47 study. The template and data extraction process will also be informed by a realist approach  
48 to thematic analysis, which incorporates different forms of reasoning (inductive, deductive,  
49 abductive and retroductive) into thematic analysis, and requires all three ontological layers to  
50 be considered.[52] While the use of a data extraction template resembles a codebook  
51 approach to thematic analysis, the realist approach will be utilised to consider both manifest  
52 semantic content, such as outcomes, as well as latent content, such as potential  
53 mechanisms. This approach will enable us to start eliciting theories already at the data  
54 extraction phase.  
55  
56

57 The starting point for quality assessment will be to use the relevant design-specific Critical  
58 Appraisals Skills Programme (CASP) checklist[68] to appraise each peer-reviewed study,  
59  
60

1  
2  
3 and Tyndall's checklist for grey literature.[66] Additional design-specific appraisal tools may  
4 be sought where needed, and their use will be reported transparently in the review.  
5

6 Further inclusions and exclusions of literature, and refinement of inclusion criteria, may occur  
7 at this point. This step of the process will incorporate the review team's judgement of 'fitness  
8 for purpose' in relation to the review's aims with existing quality assessment criteria for  
9 different study designs. Considerations of 'fitness for purpose' will be guided by the two key  
10 criteria of relevance (does the research address the review's objectives and theories being  
11 developed?) and rigour (do the conclusions put forward by researchers or the review team  
12 hold in relation to the data presented?) as well as the six principles detailed in Figure  
13 2.[46,47,58]  
14  
15  
16

#### 17 **Step 4: Synthesise evidence and draw conclusions**

18 Analysis and synthesis of data extracted in the previous step will be carried out through  
19 further iterations of the realist approach to thematic analysis,[52] with a particular focus on  
20 utilising abductive thinking and retroductive theorising (Table 1) to elicit new theories and  
21 build on the initial theories presented here.[44] Abductive thinking will allow us to postulate  
22 what types of mechanisms might be involved in generating specific outcomes. Through  
23 retroduction, we will link the hypothesised constructs to formulate mechanism-based  
24 explanatory models.[43] Counterfactual thinking (Table 1) will be applied with the help of  
25 evidence that seems to refute or disagree with the emerging conclusions. For example, there  
26 could be an emerging conclusion that remuneration and related expectations around  
27 community engagement are a dominant mechanism determining outcomes, such as  
28 participant retention, in contexts of poverty and inequality. This observation would be  
29 considered against evidence of community engagement through which high participant  
30 retention has been successfully achieved without significant material gains being expected or  
31 received by the community.  
32  
33  
34

35 These analytical phases will be done in consultation with the review team and stakeholders  
36 to further develop, refine or refute the initial programme theory, as well as consider historical  
37 context (for example, colonialism, ethically sound or exploitative research, and donor  
38 dynamics) of findings. The analysis and synthesis of review findings to draw conclusions will  
39 be a particularly iterative step in the process, and will likely involve further data extraction  
40 and identification of additional relevant literature (see Figure 2). Changes and developments  
41 in programme theories will be documented and transparently reported to show a trail of  
42 gradual theory building.  
43  
44  
45  
46

#### 47 **Step 5: Disseminate, implement and evaluate**

48 The output of this proposed review is expected to have practical applications in NCD  
49 research, interventions and other health promotion efforts. To ensure this, further stakeholder  
50 consultation will be carried out in the form of discussions and realist interviews[69] with  
51 researchers, activists and community members in the research context in which SK and CED  
52 work in South Africa. These consultations will contribute to further iterations of the review  
53 steps as relevant, and form an evaluative component of the review, through which the six  
54 guiding principles can be further realised.[58] See Ethics and dissemination for further details  
55 about dissemination and implementation.  
56  
57  
58  
59  
60

### **Patient and Public Involvement**

This realist review involves stakeholder consultation at different stages. Initial expert stakeholder consultation has targeted researchers internationally, whereas later stages will gather input from researchers, practitioners, community organisations and individuals in South Africa through the consultation process described above, and an adjacent qualitative study of community engagement in health research in South Africa. Utilising in-depth qualitative methods, such as realist interviews[69] in combination with informal online (email, video call) feedback consultations with experts, will enable capturing varied input on theories and other review findings from a range of stakeholders.

### **Ethics and dissemination**

Formal ethics review is not required for the review itself, as it constitutes secondary research with element of peer feedback from relevant researchers. Ethical approval has been obtained (M200641) from the University of the Witwatersrand Human Research Ethics Committee (Medical) for wider stakeholder consultation, including qualitative fieldwork with a range of participants. Dissemination will include traditional academic channels (publications, conferences, seminars), inclusion of findings in new community engagement strategies developed by authors for their research units, as well as sharing of findings at community engagement events in South Africa and beyond, through plain language publications or summaries, social media and in discussions with a wide range of stakeholders.

## REFERENCES

- 1 Reynolds L, Sariola S. The ethics and politics of community engagement in global health research. *Crit. Public Health*. 2018;**28**:257–68. doi:10.1080/09581596.2018.1449598
- 2 King KF, Kolopack P, Merritt MW, *et al*. Community engagement and the human infrastructure of global health research. *BMC Med. Ethics*. 2014;**15**:84. doi:10.1186/1472-6939-15-84
- 3 Adhikari B, Pell C, Cheah PY. Community engagement and ethical global health research. *Glob Bioeth* 2020;**31**:1–12. doi:10.1080/11287462.2019.1703504
- 4 Marsh VM, Kamuya DK, Parker MJ, *et al*. Working with concepts: The role of community in international collaborative biomedical research. In: *Public Health Ethics*. Public Health Ethics 2011. 26–39. doi:10.1093/phe/phr007
- 5 Wilkinson A, Parker M, Martineau F, *et al*. Engaging ‘communities’: Anthropological insights from the west African ebola epidemic. *Philos Trans R Soc B Biol Sci* 2017;**372**. doi:10.1098/rstb.2016.0305
- 6 Hamed S, Klingberg S, Mahmud AJ, *et al*. Researching health in diverse neighbourhoods: critical reflection on the use of a community research model in Uppsala, Sweden. *BMC Res Notes* 2018;**11**:612. doi:10.1186/s13104-018-3717-7
- 7 Clinical and Translational Science Awards Consortium Community Engagement Key Function Committee Task Force on the Principles of Community Engagement. Principles of Community Engagement, Second Edition. 2011.
- 8 Adhikari B, Vincent R, Wong G, *et al*. A realist review of community engagement with health research. *Wellcome Open Res* 2019;**4**:87. doi:10.12688/wellcomeopenres.15298.2
- 9 Dickert N, Sugarman J. Ethical goals of community consultation in research. *Am. J. Public Health*. 2005;**95**:1123–7. doi:10.2105/AJPH.2004.058933
- 10 Bartholomew Eldredge LK, Markham CM, Ruiter RAC, *et al*. *Planning health promotion programs : an intervention mapping approach*. 4th editio. Jossey-Bass 2016.
- 11 O’Cathain A, Croot L, Duncan E, *et al*. Guidance on how to develop complex interventions to improve health and healthcare. *BMJ Open* 2019;**9**:e029954. doi:10.1136/bmjopen-2019-029954
- 12 Williams O, Sarre S, Papoulias SC, *et al*. Lost in the shadows: reflections on the dark side of co-production. *Heal. Res. policy Syst*. 2020;**18**:43. doi:10.1186/s12961-020-00558-0
- 13 Jagosh J, Macaulay AC, Pluye P, *et al*. Uncovering the Benefits of Participatory Research: Implications of a Realist Review for Health Research and Practice. *Milbank Q* 2012;**90**:311–46. doi:10.1111/j.1468-0009.2012.00665.x
- 14 Abimbola S. Beyond positive a priori bias: reframing community engagement in LMICs. *Health Promot Int* 2020;**35**:598–609. doi:10.1093/heapro/daz023
- 15 Ndinda C, Hongoro C, Chilwane D, *et al*. Civil Society Activism for the Prevention and Treatment of Non-communicable Diseases in South Africa: Implications for Policy and Practice. Springer, Cham 2015. 191–207. doi:10.1007/978-3-319-16166-2\_13



- 1  
2  
3 16 Ndinda C, Ndhlovu TP, Juma P, *et al.* The evolution of non-communicable diseases  
4 policies in post-apartheid South Africa. *BMC Public Health* 2018;**18**.  
5 doi:10.1186/s12889-018-5832-8  
6
- 7 17 Luna F, Luyckx VA. Why have Non-communicable Diseases been Left Behind? *Asian*  
8 *Bioeth Rev* 2020;**12**:5–25. doi:10.1007/s41649-020-00112-8  
9
- 10 18 Jagosh J, Bush PL, Salsberg J, *et al.* A realist evaluation of community-based  
11 participatory research: Partnership synergy, trust building and related ripple effects.  
12 *BMC Public Health* 2015;**15**:725. doi:10.1186/s12889-015-1949-1  
13
- 14 19 Waddell CM, Herron R V, Gobeil J, *et al.* Grounded in Culture: Reflections on Sitting  
15 Outside the Circle in Community-Based Research With Indigenous Men. *Qual Health*  
16 *Res* 2020;**30**:2343–50. doi:10.1177/1049732320960050  
17
- 18 20 Nyirenda D, Sariola S, Kingori P, *et al.* Structural coercion in the context of community  
19 engagement in global health research conducted in a low resource setting in Africa.  
20 *BMC Med Ethics* 2020;**21**:90. doi:10.1186/s12910-020-00530-1  
21
- 22 21 Bird-Naytowhow K, Hatala AR, Pearl T, *et al.* Ceremonies of Relationship: Engaging  
23 Urban Indigenous Youth in Community-Based Research. *Int J Qual Methods* 2017;**16**.  
24 doi:10.1177/1609406917707899  
25
- 26 22 Burgess RA, Jain S, Petersen I, *et al.* Social interventions: a new era for global mental  
27 health? *The Lancet Psychiatry*. 2020;**7**:118–9. doi:10.1016/S2215-0366(19)30397-9  
28
- 29 23 Campbell C, Burgess R. The role of communities in advancing the goals of the  
30 Movement for Global Mental Health. *Transcult Psychiatry* 2012;**49**:379–95.  
31 doi:10.1177/1363461512454643  
32
- 33 24 De Weger E, Van Vooren NJE, Drewes HW, *et al.* Searching for new community  
34 engagement approaches in the Netherlands: A realist qualitative study. *BMC Public*  
35 *Health* 2020;**20**:508. doi:10.1186/s12889-020-08616-6  
36
- 37 25 Sambieni NE. Differences and structural weaknesses of institutional mechanisms for  
38 health research ethics: Burkina Faso, Palestine, Peru, and Democratic Republic of the  
39 Congo. *BMC Med Ethics* 2018;**19**:47. doi:10.1186/s12910-018-0284-3  
40
- 41 26 Roth GA, Abate D, Abate KH, *et al.* Global, regional, and national age-sex-specific  
42 mortality for 282 causes of death in 195 countries and territories, 1980–2017: a  
43 systematic analysis for the Global Burden of Disease Study 2017. *Lancet*  
44 2018;**392**:1736–88. doi:10.1016/S0140-6736(18)32203-7  
45
- 46 27 Gouda HN, Charlson F, Sorsdahl K, *et al.* Burden of non-communicable diseases in  
47 sub-Saharan Africa, 1990-2017: results from the Global Burden of Disease Study  
48 2017. *Lancet Glob Heal* 2019;**7**:e1375–87. doi:10.1016/S2214-109X(19)30374-2  
49
- 50 28 Allotey P, Davey T, Reidpath DD. NCDs in low and middle-income countries -  
51 assessing the capacity of health systems to respond to population needs. *BMC Public*  
52 *Health* 2014;**14 Suppl 2**:S1. doi:10.1186/1471-2458-14-S2-S1  
53
- 54 29 Bosire E, Mendenhall E, Omondi GB, *et al.* When Diabetes Confronts HIV: Biological  
55 Sub-citizenship at a Public Hospital in Nairobi, Kenya. *Med Anthropol Q* 2018;**32**:574–  
56 92. doi:10.1111/maq.12476  
57
- 58 30 World Health Organization. WHO EMRO Health promotion and disease prevention  
59 through population-based interventions, including action to address social  
60 determinants and health inequity. 2021.<http://www.emro.who.int/about-who/public-health-functions/health-promotion-disease-prevention.html> (accessed 3 Feb 2021).

- 1  
2  
3 31 Lynch HM, Green AS, Clarke Nanyonga R, *et al.* Exploring patient experiences with  
4 and attitudes towards hypertension at a private hospital in Uganda: A qualitative study.  
5 *Int J Equity Health* 2019;**18**:206. doi:10.1186/s12939-019-1109-9  
6
- 7 32 Ware LJ, Pioreschi A, Bosire E, *et al.* Environmental, Social, and Structural  
8 Constraints for Health Behavior: Perceptions of Young Urban Black Women During  
9 the Preconception Period-A Healthy Life Trajectories Initiative. *J Nutr Educ Behav*  
10 2019;**51**:946–57. doi:10.1016/j.jneb.2019.04.009  
11
- 12 33 Draper CE, Bosire E, Pioreschi A, *et al.* Urban young women’s preferences for  
13 intervention strategies to promote physical and mental health preconception: A  
14 Healthy Life Trajectories Initiative (HeLTI). *Prev Med Reports* 2019;**14**.  
15 doi:10.1016/j.pmedr.2019.100846  
16
- 17 34 Draper CE, Pioreschi A, Ware LJ, *et al.* Pilot implementation of Bukhali: A  
18 preconception health trial in South Africa. *SAGE open Med*  
19 2020;**8**:2050312120940542. doi:10.1177/2050312120940542  
20
- 21 35 Morrison J, Akter K, Jennings HM, *et al.* Participatory learning and action to address  
22 type 2 diabetes in rural Bangladesh: A qualitative process evaluation. *BMC Endocr*  
23 *Disord* 2019;**19**:118. doi:10.1186/s12902-019-0447-3  
24
- 25 36 Mannell J, Davis K, Akter K, *et al.* Visual Participatory Analysis: A Qualitative Method  
26 for Engaging Participants in Interpreting the Results of Randomized Controlled Trials  
27 of Health Interventions. *J Mix Methods Res* 2020;:155868982091480.  
28 doi:10.1177/1558689820914806
- 29 37 Fottrell E, Ahmed N, Morrison J, *et al.* Community groups or mobile phone messaging  
30 to prevent and control type 2 diabetes and intermediate hyperglycaemia in  
31 Bangladesh (DMagic): a cluster-randomised controlled trial. *Lancet Diabetes*  
32 *Endocrinol* 2019;**7**:200–12. doi:10.1016/S2213-8587(19)30001-4  
33
- 34 38 Chibanda D, Mesu P, Kajawu L, *et al.* Problem-solving therapy for depression and  
35 common mental disorders in Zimbabwe: Piloting a task-shifting primary mental health  
36 care intervention in a population with a high prevalence of people living with HIV. *BMC*  
37 *Public Health* 2011;**11**:828. doi:10.1186/1471-2458-11-828  
38
- 39 39 Chibanda D, Weiss HA, Verhey R, *et al.* Effect of a primary care-based psychological  
40 intervention on symptoms of common mental disorders in Zimbabwe: A randomized  
41 clinical trial. *JAMA - J Am Med Assoc* 2016;**316**:2618–26.  
42 doi:10.1001/jama.2016.19102  
43
- 44 40 NCD Alliance. Our Views, Our Voices. 2021.[https://ncdalliance.org/what-we-  
45 do/capacity-development/our-views-our-voices](https://ncdalliance.org/what-we-do/capacity-development/our-views-our-voices) (accessed 19 Feb 2021).  
46
- 47 41 Mukumbang FC. *A realist evaluation of the antiretroviral treatment adherence club*  
48 *programme in the metropolitan area of the Western Cape Province, South Africa.*  
49 2018.  
50
- 51 42 Bhaskar R. *A realist theory of science.* Routledge/Taylor & Francis Group 2008.  
52
- 53 43 Mukumbang FC, van Wyk B. Leveraging the Photovoice Methodology for Critical  
54 Realist Theorizing. *Int J Qual Methods* 2020;**19**:160940692095898.  
55 doi:10.1177/1609406920958981
- 56 44 Jagosh J. Retroductive theorizing in Pawson and Tilley’s applied scientific realism. *J*  
57 *Crit Realis* 2020;**19**:121–30. doi:10.1080/14767430.2020.1723301  
58
- 59 45 de Souza DE. Culture, context and society - The underexplored potential of critical  
60 realism as a philosophical framework for theory and practice. *Asian J Soc Psychol*

- 2014;**17**:141–51. doi:10.1111/ajsp.12052
- 46 Wong G, Greenhalgh T, Westhorp G, *et al*. RAMESES publication standards: Realist syntheses. *BMC Med* 2013;**11**:21. doi:10.1186/1741-7015-11-21
- 47 Pawson R, Greenhalgh T, Harvey G, *et al*. Realist review - A new method of systematic review designed for complex policy interventions. *J. Heal. Serv. Res. Policy*. 2005;**10**:21–34. doi:10.1258/1355819054308530
- 48 Jagosh J. Realist Synthesis for Public Health: Building an Ontologically Deep Understanding of How Programs Work, For Whom, and In Which Contexts. *Annu Rev Public Health* 2019;**40**:361–72. doi:10.1146/annurev-publhealth-031816-044451
- 49 De Weger E, Van Vooren NJE, Wong G, *et al*. What's in a Realist Configuration? Deciding Which Causal Configurations to Use, How, and Why. *Int J Qual Methods* 2020;**19**:160940692093857. doi:10.1177/1609406920938577
- 50 Hinds K, Dickson K. Realist synthesis: a critique and an alternative. *J Crit Realis* 2021;**20**:1–17. doi:10.1080/14767430.2020.1860425
- 51 Bhaskar R. Forms of realism. *Philosophica* 1975;**15**:99–127.
- 52 Wiltshire G, Ronkainen N. A realist approach to thematic analysis: making sense of qualitative data through experiential, inferential and dispositional themes. *J Crit Realis* Published Online First: 2021. doi:10.1080/14767430.2021.1894909
- 53 Pawson R, Tilley N. *Realistic Evaluation*. SAGE Publications Ltd 1997.
- 54 Mukumbang FC, Marchal B, Van Belle S, *et al*. A realist approach to eliciting the initial programme theory of the antiretroviral treatment adherence club intervention in the Western Cape Province, South Africa. *BMC Med Res Methodol* 2018;**18**:47. doi:10.1186/s12874-018-0503-0
- 55 Greenhalgh J, Manzano A. Understanding 'context' in realist evaluation and synthesis. *Int J Soc Res Methodol* 2021;**1**:1–14. doi:10.1080/13645579.2021.1918484
- 56 Ritz B. Comparing abduction and retroduction in Peircean pragmatism and critical realism. *J Crit Realis* 2020;**19**:456–65. doi:10.1080/14767430.2020.1831817
- 57 Eastwood JG, Jalaludin BB, Kemp LA. Realist explanatory theory building method for social epidemiology: A protocol for a mixed method multilevel study of neighbourhood context and postnatal depression. *Springerplus* 2014;**3**:1–12. doi:10.1186/2193-1801-3-12
- 58 Wong G, Greenhalgh T, Westhorp G, *et al*. RAMESES publication standards: Meta-narrative reviews. *BMC Med* 2013;**11**:20. doi:10.1186/1741-7015-11-20
- 59 Caswell RJ, Maidment I, Ross JDC, *et al*. How, why, for whom and in what context, do sexual health clinics provide an environment for safe and supported disclosure of sexual violence: Protocol for a realist review. *BMJ Open*. 2020;**10**. doi:10.1136/bmjopen-2020-037599
- 60 Abrams R, Wong G, Mahtani KR, *et al*. Understanding the impact of delegated home visiting services accessed via general practice by community-dwelling patients: A realist review protocol. *BMJ Open* 2018;**8**:24876. doi:10.1136/bmjopen-2018-024876
- 61 Duddy C, Wong G. Explaining variations in test ordering in primary care: protocol for a realist review. *BMJ Open*. 2018;**8**:e023117. doi:10.1136/bmjopen-2018-023117
- 62 Greenhalgh T, Thorne S, Malterud K. Time to challenge the spurious hierarchy of systematic over narrative reviews? *Eur J Clin Invest* 2018;**48**:e12931.

- 1  
2  
3 doi:10.1111/eci.12931  
4  
5 63 Booth A, Briscoe S, Wright JM. The “realist search”: A systematic scoping review of  
6 current practice and reporting. *Res Synth Methods* 2020;**11**:14–35.  
7 doi:10.1002/jrsm.1386  
8  
9 64 Bates MJ. The design of browsing and berrypicking techniques for the online search  
10 interface. *Online Inf. Rev.* 1989;**13**:407–24. doi:10.1108/eb024320  
11  
12 65 Wong G, Westhrop G, Pawson R, *et al.* Realist synthesis RAMESES training  
13 materials.  
14 2013.[http://www.ramesesproject.org/index.php?pr=Project\\_outputs#method](http://www.ramesesproject.org/index.php?pr=Project_outputs#method).  
15 (accessed 22 Feb 2021).  
16  
17 66 Tyndall J. AACODS Checklist.  
18 2010.[https://dspace.flinders.edu.au/xmlui/bitstream/handle/2328/3326/AACODS\\_Chec](https://dspace.flinders.edu.au/xmlui/bitstream/handle/2328/3326/AACODS_Checklist.pdf;jsessionid=67E9E0E44805CE646B50C475C7ACD013?sequence=4)  
19 [klist.pdf;jsessionid=67E9E0E44805CE646B50C475C7ACD013?sequence=4](https://dspace.flinders.edu.au/xmlui/bitstream/handle/2328/3326/AACODS_Checklist.pdf;jsessionid=67E9E0E44805CE646B50C475C7ACD013?sequence=4)  
20 (accessed 19 Feb 2021).  
21  
22 67 Adams J, Hillier-Brown FC, Moore HJ, *et al.* Searching and synthesising ‘grey  
23 literature’ and ‘grey information’ in public health: Critical reflections on three case  
24 studies. *Syst Rev* 2016;**5**:164. doi:10.1186/s13643-016-0337-y  
25  
26 68 Critical Appraisal Skills Programme. CASP Checklists. 2021.[https://casp-uk.net/casp-](https://casp-uk.net/casp-tools-checklists/)  
27 [tools-checklists/](https://casp-uk.net/casp-tools-checklists/) (accessed 4 May 2021).  
28  
29 69 Mukumbang FC, Marchal B, Van Belle S, *et al.* Using the realist interview approach to  
30 maintain theoretical awareness in realist studies. *Qual Res* 2020;**20**:485–515.  
31 doi:10.1177/1468794119881985  
32  
33  
34  
35  
36  
37  
38  
39  
40  
41  
42  
43  
44  
45  
46  
47  
48  
49  
50  
51  
52  
53  
54  
55  
56  
57  
58  
59  
60

### Authors' contributions

SK conceptualised the study with input from FCM, CED and BA. SK designed and drafted the review protocol. FCM, BA, CED, ENB, PT and DN contributed to protocol development. FCM and BA provided methodological guidance. BA and SK developed initial programme theories with input from other authors and stakeholders. BA, CED, FCM, ENB, PT and DN critically reviewed and edited the manuscript. All authors read and approved the final manuscript.

### Funding

The work of SK was supported by Koneen Säätiö (grant number 201901846).

### Conflict of interest

None to declare.

### Acknowledgements

The authors would like to thank all colleagues and stakeholders who have contributed time and feedback to this review protocol during globally challenging times. Eleanor Winpenny's initial inspiration for adopting a realist review approach is gratefully acknowledged.

### Figure titles

Figure 1 The role of community engagement in health interventions

Figure 2 Realist review process and cross-cutting principles[46–48,58]

Figure 3 Initial theories: potential community engagement trajectories in health research and interventions[8,13,18–20,48]

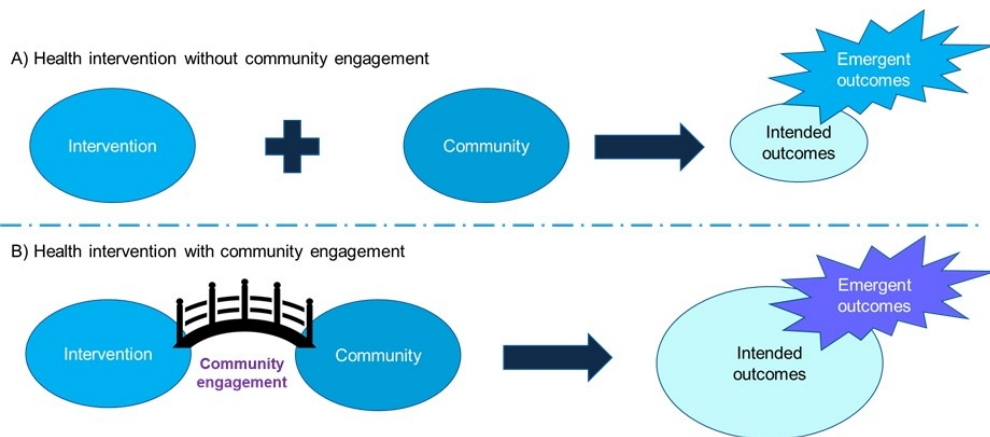

Figure 1 The role of community engagement in health interventions

157x67mm (150 x 150 DPI)

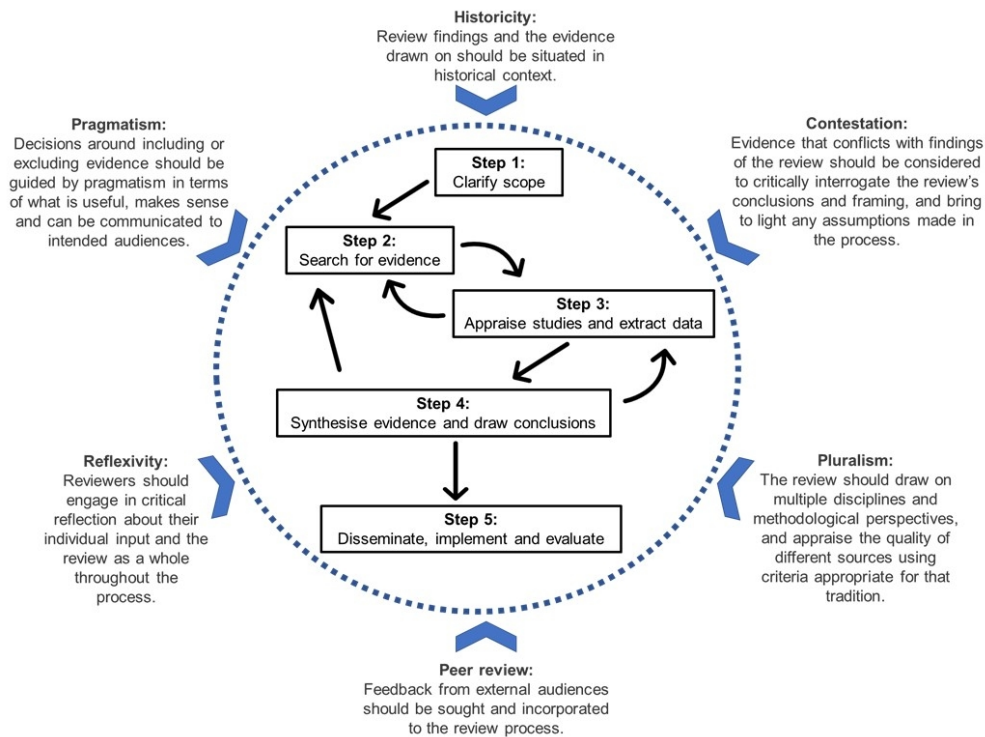

Figure 2 Realist review process and cross-cutting principles[46–48,58]

175x130mm (150 x 150 DPI)

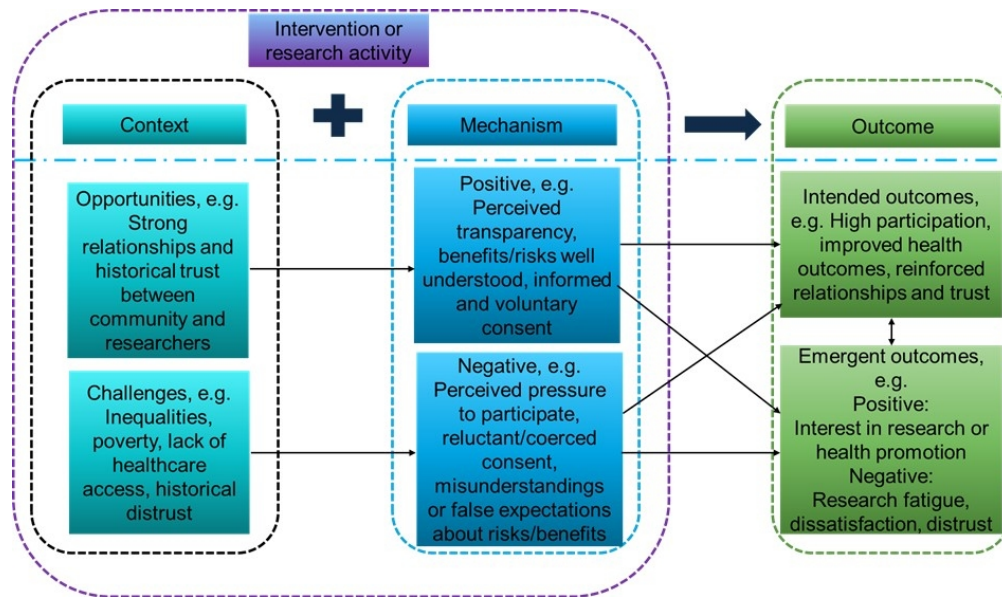

Figure 3 Initial theories: potential community engagement trajectories in health research and interventions[8,13,18–20,48]

160x94mm (150 x 150 DPI)



1  
2  
3 **Supplementary file 1: Initial searches by database**  
4

5 Engaging communities in non-communicable disease research and interventions in low- and  
6 middle-income countries: a realist review protocol  
7

8 Authors: Sonja Klingberg, Bipin Adhikari, Catherine E. Draper, Edna N. Bosire, Priscilla  
9 Tiigah, Deborah Nyirenda and Ferdinand C. Mukumbang  
10

11  
12 **Google Scholar:**  
13

14 "community engagement" AND ("low-income country" OR "middle-income country" OR Imic)  
15 AND ("non-communicable disease") AND (intervention OR prevention)  
16  
17

18  
19 **PubMed:**  
20

21 ("community engagement" OR participatory OR "community-led" OR stakeholder\*) AND  
22 ("low-income country" OR "middle-income country" OR Imic) AND (diabetes OR hypertension  
23 OR "blood pressure" OR cardiovascular OR cancer OR chronic OR "mental health" OR  
24 depression OR anxiety OR "non-communicable disease")  
25  
26

27  
28 **Scopus:**  
29

30 ("community engagement" OR participatory OR "community-led") AND ("low-income country"  
31 OR "middle-income country" OR Imic) AND ("non-communicable disease")  
32  
33  
34  
35  
36  
37  
38  
39  
40  
41  
42  
43  
44  
45  
46  
47  
48  
49  
50  
51  
52  
53  
54  
55  
56  
57  
58  
59  
60

# BMJ Open

## Engaging communities in non-communicable disease research and interventions in low- and middle-income countries: a realist review protocol

|                                 |                                                                                                                                                                                                                                                                                                                                                                                                                                                                                                                                                                                                                                                                                                                                                                                                                                                                                                                                |
|---------------------------------|--------------------------------------------------------------------------------------------------------------------------------------------------------------------------------------------------------------------------------------------------------------------------------------------------------------------------------------------------------------------------------------------------------------------------------------------------------------------------------------------------------------------------------------------------------------------------------------------------------------------------------------------------------------------------------------------------------------------------------------------------------------------------------------------------------------------------------------------------------------------------------------------------------------------------------|
| Journal:                        | <i>BMJ Open</i>                                                                                                                                                                                                                                                                                                                                                                                                                                                                                                                                                                                                                                                                                                                                                                                                                                                                                                                |
| Manuscript ID                   | bmjopen-2021-050632.R2                                                                                                                                                                                                                                                                                                                                                                                                                                                                                                                                                                                                                                                                                                                                                                                                                                                                                                         |
| Article Type:                   | Protocol                                                                                                                                                                                                                                                                                                                                                                                                                                                                                                                                                                                                                                                                                                                                                                                                                                                                                                                       |
| Date Submitted by the Author:   | 30-Jun-2021                                                                                                                                                                                                                                                                                                                                                                                                                                                                                                                                                                                                                                                                                                                                                                                                                                                                                                                    |
| Complete List of Authors:       | Klingberg, Sonja; University of the Witwatersrand Faculty of Health Sciences, SAMRC/Wits Developmental Pathways for Health Research Unit (DPHRU)<br>Adhikari, Bipin; Mahidol University, Mahidol-Oxford Tropical Medicine Research Unit, Faculty of Tropical Medicine; University of Oxford, Centre for Tropical Medicine and Global Health, Nuffield Department of Medicine<br>Draper, Catherine; University of the Witwatersrand, SAMRC/Wits Developmental Pathways for Health Research Unit (DPHRU)<br>Bosire, Edna; University of the Witwatersrand Faculty of Health Sciences, SAMRC/Wits Developmental Pathways for Health Research Unit (DPHRU)<br>Tiigah, Priscilla; Independent researcher<br>Nyirenda, Deborah; University of Malawi, Community Engagement and Bioethics, Malawi-Liverpool-Wellcome Trust Clinical Research Programme<br>Mukumbang, Ferdinand; University of Washington, Department of Global Health |
| <b>Primary Subject Heading</b>: | Global health                                                                                                                                                                                                                                                                                                                                                                                                                                                                                                                                                                                                                                                                                                                                                                                                                                                                                                                  |
| Secondary Subject Heading:      | Ethics, Public health, Research methods                                                                                                                                                                                                                                                                                                                                                                                                                                                                                                                                                                                                                                                                                                                                                                                                                                                                                        |
| Keywords:                       | PUBLIC HEALTH, ETHICS (see Medical Ethics), PREVENTIVE MEDICINE                                                                                                                                                                                                                                                                                                                                                                                                                                                                                                                                                                                                                                                                                                                                                                                                                                                                |
|                                 |                                                                                                                                                                                                                                                                                                                                                                                                                                                                                                                                                                                                                                                                                                                                                                                                                                                                                                                                |

SCHOLARONE™  
Manuscripts



I, the Submitting Author has the right to grant and does grant on behalf of all authors of the Work (as defined in the below author licence), an exclusive licence and/or a non-exclusive licence for contributions from authors who are: i) UK Crown employees; ii) where BMJ has agreed a CC-BY licence shall apply, and/or iii) in accordance with the terms applicable for US Federal Government officers or employees acting as part of their official duties; on a worldwide, perpetual, irrevocable, royalty-free basis to BMJ Publishing Group Ltd ("BMJ") its licensees and where the relevant Journal is co-owned by BMJ to the co-owners of the Journal, to publish the Work in this journal and any other BMJ products and to exploit all rights, as set out in our [licence](#).

The Submitting Author accepts and understands that any supply made under these terms is made by BMJ to the Submitting Author unless you are acting as an employee on behalf of your employer or a postgraduate student of an affiliated institution which is paying any applicable article publishing charge ("APC") for Open Access articles. Where the Submitting Author wishes to make the Work available on an Open Access basis (and intends to pay the relevant APC), the terms of reuse of such Open Access shall be governed by a Creative Commons licence – details of these licences and which [Creative Commons](#) licence will apply to this Work are set out in our licence referred to above.

Other than as permitted in any relevant BMJ Author's Self Archiving Policies, I confirm this Work has not been accepted for publication elsewhere, is not being considered for publication elsewhere and does not duplicate material already published. I confirm all authors consent to publication of this Work and authorise the granting of this licence.

**TITLE:**

**Engaging communities in non-communicable disease research and interventions in low- and middle-income countries: a realist review protocol**

**AUTHORS:**

**Sonja Klingberg (corresponding author, ORCID: 0000-0002-9330-7102)**

SAMRC/Wits Developmental Pathways for Health Research Unit (DPHRU)

Faculty of Health Sciences

University of the Witwatersrand

Private Bag X3

Wits, Johannesburg 2050

South Africa

[sonja.klingberg@wits.ac.za](mailto:sonja.klingberg@wits.ac.za)

**Bipin Adhikari (ORCID: 0000-0001-8981-3910)**

Mahidol-Oxford Tropical Medicine Research Unit

Faculty of Tropical Medicine

Mahidol University

Bangkok

Thailand

and

Centre for Tropical Medicine and Global Health

Nuffield Department of Medicine

University of Oxford

Oxford

UK

**Catherine E. Draper (ORCID: 0000-0002-2885-437X)**

SAMRC/Wits Developmental Pathways for Health Research Unit (DPHRU)

Faculty of Health Sciences

University of the Witwatersrand

Johannesburg

South Africa

**Edna N. Bosire (ORCID: 0000-0002-4781-7101)**

SAMRC/Wits Developmental Pathways for Health Research Unit (DPHRU)

Faculty of Health Sciences

University of the Witwatersrand

Johannesburg

South Africa

**Priscilla Tiigah**

Independent researcher

London

UK

1  
2  
3 **Deborah Nyirenda (ORCID: 0000-0002-5867-4687)**

4 Community Engagement and Bioethics

5 Malawi-Liverpool-Wellcome Trust Clinical Research Programme

6 Blantyre

7 Malawi

8  
9  
10 **Ferdinand C. Mukumbang (ORCID: 0000-0003-1441-2172)**

11 Department of Global Health

12 University of Washington

13 Seattle

14 USA

15  
16  
17  
18 **Word count:**

19 **3732/4000**

20  
21  
22  
23 **Keywords:**

24 **Community engagement; non-communicable diseases; low- and middle-income**  
25 **countries; realist review; critical realism**  
26  
27  
28  
29  
30  
31  
32  
33  
34  
35  
36  
37  
38  
39  
40  
41  
42  
43  
44  
45  
46  
47  
48  
49  
50  
51  
52  
53  
54  
55  
56  
57  
58  
59  
60

## ABSTRACT

### Introduction

Engaging communities and intended beneficiaries at various stages of health research is a recommended practice. The contribution of community engagement to non-communicable disease research in low- and middle-income countries has not yet been extensively studied or synthesised. This protocol describes the steps towards generating an understanding of community engagement in the context of non-communicable disease research, prevention and health promotion using a realist review approach. A realist lens enables a rich explanatory approach to causation while capturing complexity, and an openness to multiple outcomes, including unintended consequences. The review will thus develop an understanding of community engagement without assuming that such practices result in more ethical research or effective interventions.

### Methods and analysis

We propose a realist approach aiming to examine how, why, under what circumstances, and for whom, community engagement works or does not work. The iterative review steps include clarifying the review scope; searching for evidence; appraising studies and extracting data; synthesising evidence and drawing conclusions; and disseminating, implementing and evaluating the findings. Principles of meta-narrative review (pragmatism, pluralism, historicity, contestation, reflexivity and peer review) are employed to ensure practicable and contextualised review outputs. The proposed review will draw on theoretical and empirical literature beyond specific diseases or settings, but with a focus on informing non-communicable disease research and interventions in low- and middle-income countries. The synthesis of existing literature will be complemented by qualitative realist interviews and stakeholder consultation. Through drawing on multiple types of evidence and input from both experts and intended beneficiaries, the review will provide critical and pragmatic insights for research and community engagement in low- and middle-income countries.

### Ethics and dissemination

Ethical approval has been obtained from the University of the Witwatersrand. Dissemination will include traditional academic channels, institutional communications, social media and discussions with a wide range of stakeholders.

(299/300 words)

## ARTICLE SUMMARY

### Strengths and limitations of this study

- The realist review approach will provide novel explanatory evidence, transcending mere descriptions to unearth what mechanisms and contextual elements are at play to achieve meaningful community engagement with non-communicable disease research in low- and middle-income countries.
- The review will integrate information obtained from multiple sources to develop robust explanatory models on the specifics of interventions and research around non-communicable diseases.
- The protocol draws on the meta-narrative review principles of pragmatism, pluralism, historicity, contestation, reflexivity and peer review to ensure a rich and rigorous synthesis.
- Effective stakeholder engagement with a diverse range of stakeholders is limited by the COVID-19 pandemic.
- A realist review cannot produce an exhaustive account of all contexts, mechanisms and outcomes of potential relevance to non-communicable disease prevention.

## INTRODUCTION

### Community engagement

The concept and practices of community engagement can be traced back to the pursuit of participatory approaches in scientific research from the 1960s onwards, particularly in the fields of global health and international development.[1] In the context of health research, community engagement can be viewed as a strategy for building and maintaining “relationships between researchers and the stakeholder community — the unique collection of diverse stakeholders who have interests in the conduct and/or outcomes of a given research project”. [2] Community engagement is, however, used to refer to a multitude of practices, and the concept is somewhat ambiguous when it comes to both terms, ‘community’ and ‘engagement’. [3–5] Communities can, for example, consist of intended beneficiaries, residents of a particular geographical area, or a group of individuals with shared interests or connected identities. However, researchers and the perceived communities may have rather different understandings of what constitutes a community, and who belongs to it. [6] Engagement can mean: minimal outreach with limited involvement from stakeholders, mostly with the purpose of providing them information about the research; consultation with some input from stakeholders to researchers; stakeholder and participant involvement at different stages of research; different forms of collaboration; and, most comprehensively, shared leadership with a strong bidirectional relationship between stakeholders and researchers. [7] In practice, the involvement of non-academic stakeholders through practices such as community engagement or participatory methods plays an important role in public health research and interventions; and large funding bodies are increasingly emphasising community or public engagement when awarding grants for large trials. [2, 7–9]

Guidance for developing and evaluating complex public health interventions recommends involving intended beneficiaries and other relevant stakeholders throughout the process. [10, 11] Approaches such as co-design or co-production are gaining popularity, at least within the jargon used to describe intervention research. [12] While there are many ethical and practical reasons [13] to promote the participation of community members and stakeholders in different phases of research, intervention development, implementation and dissemination, there are also numerous reasons for individuals or communities to not want to engage with research either as participants or in advisory roles. Moreover, those individuals or groups who do participate actively in shaping research questions or guiding intervention design bring with them their own agendas, which may or may not align with other intended outcomes of research and interventions.

In recognition of this complexity, Abimbola [14] calls for a move beyond a positive *a priori* bias in favour of community engagement, which typically involves assumptions that people want to participate in decision-making about their health, and that community engagement will generally lead to favourable outcomes. These assumptions are particularly important to question in the context of non-communicable disease (NCD) prevention, which is less visibly characterised by civil society activism and community-led responses than, for example, HIV/AIDS [15, 16]. Indeed, although NCDs are the leading causes of morbidity and mortality worldwide, and increasingly so in low- and middle-income countries (LMICs), the prevention of NCDs has tended to be deprioritised vis-à-vis problems perceived as more acute and urgent. [17]



1  
2  
3 Previous research on community engagement and participatory research approaches  
4 indicate that trust and power-sharing between researchers and communities,[18,19] and  
5 expected or tangible benefits received by the community,[20] play a role in contributing  
6 towards how appealing engagement is from the point of view of potential participants and  
7 targeted communities. Furthermore, factors such as resource constraints, varying levels of  
8 education, existing inequalities, historical tensions, or even a history of harm done under the  
9 guise of public health research, are bound to influence people's willingness and ability to  
10 engage with research or interventions.[14,19–21] It is, therefore, important to examine how  
11 different approaches to community engagement, from purely researcher-led to more  
12 community-centred or transformative practices with more power-sharing, may have different  
13 outcomes in terms of ethics, effectiveness, scalability and sustainability.[7,22–24]

14  
15  
16  
17 As described by Adhikari and colleagues,[3] the goals of community engagement in health  
18 research can broadly be divided into research-related and ethical outcomes, although there  
19 are notably also overlaps between these categories. For example, enhancing participant  
20 recruitment and ensuring retention are predominantly research-related goals of community  
21 engagement, while supporting the consent process can be seen as both an ethical and a  
22 research-related goal. In practice, without deliberate effort,[2] even the ethical goals of  
23 community engagement, such as minimising risks, burdens and exploitation may not go  
24 much beyond institutional demands for research ethics, which do not necessarily capture  
25 community interests beyond minimising obvious harms.[25] Indeed, it is important to  
26 acknowledge that community engagement itself can be harmful or contribute to harmful  
27 research.[20] This review will, therefore, explore an understanding of the contexts and  
28 mechanisms that can produce harmful outcomes, and those that can protect participants and  
29 communities from harm.  
30  
31  
32  
33  
34

### 35 **NCD prevention and community engagement in LMICs**

36  
37 NCDs comprise a huge variety of diseases and conditions to which over 70% of the global  
38 burden of mortality can be attributed.[26] Globally, a vast majority of NCD-related deaths  
39 occur in LMICs that are seeing a shift from predominantly communicable diseases and  
40 childhood illnesses to a disease burden characterised mostly by NCDs.[27] An increased  
41 focus on NCD prevention, management and treatment has been seen in both research and  
42 policy, but funding priorities still often reflect a focus on specific communicable  
43 diseases.[28,29]

44  
45  
46 If health promotion is seen as “the process of empowering people to increase control over  
47 their health and its determinants”,[30] community engagement and participatory approaches  
48 are suitable elements for research that aims to prevent NCDs and promote health. However,  
49 due to the prevailing perceptions in many settings that NCDs are ‘lifestyle’ illnesses, non-  
50 urgent or self-inflicted,[17] and the often relatively asymptomatic nature of some NCDs such  
51 as hypertension,[31] it can be expected that interest for engaging with NCD prevention  
52 efforts may be limited among communities affected by NCDs. Indeed, qualitative evidence  
53 from South Africa suggests that the immediacy of concerns such as unemployment, safety  
54 and food insecurity understandably mean that potential future health outcomes are low on  
55 many people's agendas, and ‘health and its determinants’ are not under individuals' control  
56 due to socio-economic and structural constraints.[32–34]

1  
2  
3 Nevertheless, there are also examples of successful engagement of communities in  
4 addressing NCDs in LMIC settings. A community-based diabetes prevention trial in  
5 Bangladesh found participatory learning and action groups to be an effective intervention to  
6 prevent type 2 diabetes, while also utilising methods such as participatory visual analysis to  
7 engage participants in interpreting the results of the trial.[35–37] Similarly, a successful  
8 community-based mental health intervention called the ‘Friendship Bench’ was developed in  
9 Zimbabwe following community stakeholders’ call for an intervention.[38,39] Globally, civil  
10 society actors play a pivotal role in involving community voices and the lived experience of  
11 people with NCDs in campaigns and advocacy demanding government action on NCDs.[40]

12  
13  
14 For the purposes of this review, community engagement is conceptualised as a part of NCD  
15 research or interventions rather than an intervention or programme on its own. Research or  
16 interventions can take place without community engagement, and communities can carry out  
17 activities without any connection to research or interventions. In this sense, community  
18 engagement can be viewed as a bridge[41] that connects research or interventions to a  
19 community. As illustrated in Figure 1, community-based interventions without community  
20 engagement (1A) can have both intended and emergent outcomes. With community  
21 engagement (1B), the same is true, but the range of different potential outcomes may be  
22 wider due to the added element of community engagement.

23  
24  
25  
26 [Figure 1 here]

### 27 28 29 30 **Critical realism and realist reviews**

31  
32 Critical realism is a philosophical framework that draws on elements of positivist and  
33 interpretivist paradigms to propose an understanding of social activity whereby both social  
34 structure (an organised set of social institutions and patterns of institutionalised relationships)  
35 and agency (thoughts and actions taken by people) find a place.[42,43] Critical realism as a  
36 research paradigm involves a multi-layered view of reality, hypothesising the existence of  
37 mechanisms – underlying entities that can cause an event to occur – that produce social  
38 events, whether these are observed or not.[44] Realist methodology, building on critical  
39 realism through an interpretation originally referred to as scientific realism,[45] is increasingly  
40 used to evaluate public health interventions while maintaining an openness to both intended  
41 and unintended outcomes. It enables in-depth analyses of different causal mechanisms at  
42 play in generating those outcomes and *in tandem* consideration of contextual elements that  
43 (dis)activate these mechanisms.[46]

44  
45  
46  
47 While more traditional reviews of public health interventions, especially systematic reviews,  
48 tend to be concerned with the effectiveness of said interventions in achieving intended and  
49 clearly specified outcomes, realist reviews combine theory and empirical observations to  
50 uncover how, why and for whom such interventions work or not by adopting an explicit  
51 explanatory approach.[47–49] The key outputs of realist reviews are, therefore, theories and  
52 models of generative causation, often captured by a heuristic that explains how entities such  
53 as contexts and mechanisms interact in different ways to produce different intended or  
54 emergent (unintended) outcomes. The functioning of contexts (C) and mechanisms (M) in  
55 ways that produce outcomes (O) is captured by configurations referred to as CMO  
56 configurations. These concepts, and other central terms used in this review protocol, are  
57 defined in Table 1. While realist-informed research may also make use of other explanatory  
58  
59  
60

factors,[50] such as interventions and actors, as part of heuristic configurations, the starting point for the proposed review is to utilise CMO configurations as it provides sufficient explanatory depth and coherence. Other elements may be introduced if the review process seems to require it for clarity and to enhance realist causal explanations in a way that can, for example, disentangle agency from structure.[51]

**Table 1 Key concepts**

| Concept            | Definition                                                                                                                                                                                                                                                                                                                                                                                                                                                                                                                                                                                                                                                |
|--------------------|-----------------------------------------------------------------------------------------------------------------------------------------------------------------------------------------------------------------------------------------------------------------------------------------------------------------------------------------------------------------------------------------------------------------------------------------------------------------------------------------------------------------------------------------------------------------------------------------------------------------------------------------------------------|
| Critical realism   | A philosophical framework that combines positivist (the paradigm underpinning natural sciences) and interpretivist (a paradigm that emphasises experiences and interpretations over the 'objective' truth assumed by positivism) understandings of the world.[52] Of particular relevance to realist research is the concept of ontological depth,[49] depicting a stratified reality with three layers: the empirical (things and events that are observed); the actual (things that exist and events that occur but are not observed); and, the real (mechanisms that are not directly observable but can potentially cause events to occur).[43,52,53] |
| Scientific realism | An approach to theory development and testing that draws on critical realism, and makes use of realist concepts and methods, such as retrodution.[45] This is the original framework underpinning realist evaluation and reviews,[45,54] but applications of scientific realism and interpretations of the relationship between scientific and critical realism are varied and contested in the field of realist evaluation.[51]                                                                                                                                                                                                                          |
| Realist review     | A theory-driven and iterative approach to reviewing and synthesising literature in order to provide an explanation of how, why, for whom and under what circumstances programmes, policies and interventions work or do not work.[47,48]                                                                                                                                                                                                                                                                                                                                                                                                                  |
| Programme theory   | Theories that link activities and outcomes to explain how and why a change is expected to take place, representing how the mechanisms introduced into pre-existing contexts can generate outcomes.[48,55]                                                                                                                                                                                                                                                                                                                                                                                                                                                 |
| Context (C)        | The conditions (e.g. individual, organisational and environmental features), historical elements or relational and dynamic features that can potentially (dis)activate existing or introduced mechanisms.[48,49,56] This is not the same as 'setting' or 'context' in a generic sense of providing background information, and only captures those aspects of the context that have a bearing on mechanisms and outcomes.                                                                                                                                                                                                                                 |
| Mechanism (M)      | An underlying entity that produces specific outcomes in specific contexts. Mechanisms are a combination of resources (e.g. components of an intervention) and responses (e.g. the perceptions of participants) highlighting the importance of examining how interventions are received as opposed to merely considering how they are intended.[48,49]                                                                                                                                                                                                                                                                                                     |
| Outcome (O)        | Expected or actual change achieved by the combination of specific contexts and mechanisms.[48,49]                                                                                                                                                                                                                                                                                                                                                                                                                                                                                                                                                         |

|                                               |                                                                                                                                                                                                                                                                                                                                |
|-----------------------------------------------|--------------------------------------------------------------------------------------------------------------------------------------------------------------------------------------------------------------------------------------------------------------------------------------------------------------------------------|
| Context-mechanism-outcome (CMO) configuration | CMO configurations are representations of a causal relationship between contexts and mechanisms that lead to specific outcomes.[49,50]                                                                                                                                                                                         |
| Community engagement in research              | A strategy for building and maintaining relationships between researchers and the communities the research concerns, or who are intended to benefit from interventions or research findings.[2]                                                                                                                                |
| Participatory research                        | A research approach that involves research participants at different stages of the research process, for example study design, planning and analysis, rather than merely as informants or recipients of an intervention. Many different methods, such as visual participatory analysis, exist under this general approach.[36] |
| Health promotion                              | Health promotion refers to actions and processes that create better conditions for health through, for example, strengthening people's control over their own health and addressing societal determinants of ill-health.[30]                                                                                                   |
| Abductive thinking                            | A form of inventive and intuitive ('hunch-driven') thinking that allows a researcher to creatively imagine, for example, potential mechanisms to be investigated.[45,57]                                                                                                                                                       |
| Retroduction                                  | Theorising and testing of hidden causal mechanisms that have, for example, been imagined through abductive thinking or inductively inferred from descriptions of existing studies.[45,49,57]                                                                                                                                   |
| Counterfactual thinking                       | The consideration and application of contradictory evidence or alternative explanations to an interpretation, such as a CMO configuration, to further test and refine it.[48,58]                                                                                                                                               |

## Aim and objectives

This realist review protocol proposes steps towards generating an understanding of how and why community engagement enhances the benefits (or not) of interventions to facilitate NCD-related research, prevention and health promotion in LMIC settings. More specifically, the objectives of the realist review are:

- 1) To review existing theoretical and empirical literature across disciplines and settings to understand how, why, for whom and under what circumstances community engagement and participatory research approaches work or do not work.
- 2) To situate the reviewed community engagement and health research in historical perspectives, vis-à-vis bioethics and, for example, legacies of exploitative medical research and other past transgressions, including top-down or irrelevant interventions.
- 3) To inform and formulate recommendations for future research and interventions with a focus on drawing lessons for ethical, community-centred NCD prevention research and health promotion in LMIC settings.

## Context of the review

The need for a realist review stems from current work around NCD prevention and preconception health promotion in South Africa, and a recognition that the pursuit of ethical research informed by community perspectives is challenging when the health topics in question are, understandably, low on intended beneficiaries' agendas. SK and CED are involved in various research initiatives in South Africa, including qualitative research on improving community engagement practices in Soweto. However, the author team and advisors include experiences and perspectives from a range of settings beyond South Africa, helping to ensure that any transferable findings of the review can be drawn on more widely.

Currently, another realist review of community engagement with health research is being conducted by BA and other colleagues with a focus on malaria trials or other communicable disease interventions in LMICs.[8] We are not aware of other realist reviews of community engagement in NCD prevention and health promotion in LMICs, and thus consider our work to be complementary to, rather than a duplication of, existing or ongoing work.

## METHODS AND ANALYSIS

### Study design

The design of this review is based on the realist review process developed by Pawson et al.,[48] RAMESES guidelines[47,59] and recently published realist review protocols.[8,60–62] The realist search and review process is iterative and not as linear or rigid as a traditional systematic review.[63,64] It is, therefore, complex and not fully predictable, with decisions and changes being made along the way as opposed to all criteria and specifications being predefined. In addition to specific guidance for realist reviews, this review also draws on the six cross-cutting principles of meta-narrative reviews: pragmatism, pluralism, historicity, contestation, reflexivity and peer review.[59] Their definitions and roles in the proposed review are summarised in Figure 2. The following sections describe the five planned review steps, as well as progress so far, but it is likely that the exact process will evolve somewhat as the review takes shape.

1  
2  
3 [Figure 2 here]  
4  
5

### 6 **Step 1: Clarify scope**

7  
8 This step involved refining the review focus and purpose through initial informal searches,  
9 discussions, and drawing on existing theoretical and empirical literature. In terms of  
10 identifying literature and developing initial theories, the starting point was finding published  
11 articles on community engagement in NCD prevention in LMICs. This was soon expanded to  
12 include any setting, particularly literature from high-income countries that describes  
13 community engagement or participatory research with Indigenous communities, as this  
14 literature often explicitly grapples with histories of harm inflicted through research.[19,21]  
15 After thorough and iterative discussions about the review aim and objectives, two articles  
16 identified through initial, evolving searches and reading were selected (“berrypicking”[65]) to  
17 elicit the initial theories.[44] The rationale for selection was to allow a consideration of both  
18 beneficial and harmful engagement, and relevance for NCDs, even if not explicitly describing  
19 NCD research or interventions.[19,20] A list of initial theories was first elicited through  
20 abductive thinking and retroductive theorising (see Table 1).[45] This meant considering the  
21 outcomes of research and interventions described in the two selected studies, and “working  
22 backwards” to think about the conditions of reality that are necessary for such effects to  
23 manifest”.[45] The list was developed into a conceptual diagram, and the theories were  
24 further abstracted following discussions within the author team.  
25  
26  
27

28 Based on these phases described under Step 1, Figure 3 illustrates the initial selection of  
29 different salient CMO configurations. The micro theories within the model are potential causal  
30 trajectories, presented from the perspective of participants or community members as the  
31 primary actors. The figure, therefore, captures how their perceptions and experiences  
32 (including past encounters with research or interventions) mediate how new engagement or  
33 participation occurs. This enables the review to remain open to both positive and negative,  
34 intended and emergent, and ethical or other outcomes. For example, a historically good  
35 relationship between a community and researchers (C) can engender trust (M1), and thus  
36 openness to researchers’ requests (M2), which can lead to outcomes (O) such as high  
37 research participation. The initial exploratory model is not unique to NCDs, and can thus  
38 apply more broadly to health promotion efforts and research that utilise community  
39 engagement. Through later steps of the review, the focus will be to refine the initial  
40 exploratory theory to specifically inform NCD research and interventions.  
41  
42

43 Stakeholder consultation has been initiated through online correspondence with researchers  
44 who are able to give input on the review focus and initial theories based on their experience  
45 and expertise of community engagement or realist research. More comprehensive  
46 stakeholder engagement will be undertaken at later stages.  
47

48 [Figure 3 here]  
49  
50  
51

### 52 **Step 2: Search for evidence**

53  
54 Informed by the first step, a semi-systematic approach to literature searching has been  
55 developed and piloted, and will be implemented by SK. This will involve using combinations  
56 of search terms such as “community engagement”, participatory, “non-communicable  
57 disease”, community-led, “low-income country”, “middle-income country”, LMIC, NCD,  
58 diabetes, hypertension, “blood pressure”, cardiovascular, cancer, chronic, “mental health”,  
59 depression, anxiety, intervention, prevention and more in PubMed, Scopus and Google  
60

Scholar, as well as forward and backward reference checking and recommendations from stakeholders. The search will focus on NCDs to ensure a manageable scope, but other literature will be included where it can be expected to inform the review due to potentially similar mechanisms.[66] The initial search strategies are relatively narrow and targeted (see Supplementary file 1), but further iterations of the searches (e.g. including search terms such as 'Indigenous'), as well as searches targeting programme theories,[64] will likely be undertaken as the review progresses, and these will be reported on transparently.

Study selection will be purposive, meaning that the review is not expected to represent the existing evidence base in its entirety, but rather only include what the authors deem relevant for expanding, refuting, or refining the initial theories. Initial screening of studies based on title, abstract and keywords will take place simultaneously to the searches. Selected articles may be NCD-focused studies or accounts of other health research or intervention work, or any other topic, using any research design, that may feasibly inform community engagement in NCD research and interventions in LMICs. Out of studies initially identified as potentially relevant, SK will select studies in consultation with other reviewers.

The following inclusion criteria will be utilised:

- Study design: Any
- Publication date: Any, with priority given to more recent studies or particularly influential older studies that have informed later research and practice
- Document type: Any that can inform the review, including commentaries and practice-based articles, as long as they come from peer-reviewed journals or reputable and relevant sources of grey literature[67,68]
- Population or setting: Any, with priority given to LMICs or Indigenous or other marginalised communities in high-income countries
- Content: Describes some aspect of community engagement or participatory research approaches, or provides relevant perspectives and applicable information beyond these topics even if focusing on communicable diseases or NCD management rather than prevention
- Language: English

### **Step 3: Appraise studies and extract data**

Data extraction and appraisal will be carried out using a template that will be developed and piloted specifically for this realist review, covering both any data relevant to inform CMO configurations and study characteristics needed for conducting a quality assessment of each study. The template and data extraction process will also be informed by a realist approach to thematic analysis, which incorporates different forms of reasoning (inductive, deductive, abductive and retroductive) into thematic analysis, and requires all three ontological layers to be considered.[53] While the use of a data extraction template resembles a codebook approach to thematic analysis, the realist approach will be utilised to consider both manifest semantic content, such as outcomes, as well as latent content, such as potential mechanisms. This approach will enable us to start eliciting theories already at the data extraction phase.

The starting point for quality assessment will be to use the relevant design-specific Critical Appraisals Skills Programme (CASP) checklist[69] to appraise each peer-reviewed study, and Tyndall's checklist for grey literature.[67] Additional design-specific appraisal tools may be sought where needed, and their use will be reported transparently in the review.

1  
2  
3 Further inclusions and exclusions of literature, and refinement of inclusion criteria, may occur  
4 at this point. This step of the process will incorporate the review team's judgement of 'fitness  
5 for purpose' in relation to the review's aims with existing quality assessment criteria for  
6 different study designs. Considerations of 'fitness for purpose' will be guided by the two key  
7 criteria of relevance (does the research address the review's objectives and theories being  
8 developed?) and rigour (do the conclusions put forward by researchers or the review team  
9 hold in relation to the data presented?) as well as the six principles detailed in Figure  
10 2.[47,48,59]  
11  
12  
13

#### 14 **Step 4: Synthesise evidence and draw conclusions**

15  
16 Analysis and synthesis of data extracted in the previous step will be carried out through  
17 further iterations of the realist approach to thematic analysis,[53] with a particular focus on  
18 utilising abductive thinking and retroductive theorising (Table 1) to elicit new theories and  
19 build on the initial theories presented here.[45] Abductive thinking will allow us to postulate  
20 what types of mechanisms might be involved in generating specific outcomes. Through  
21 retroduction, we will link the hypothesised constructs to formulate mechanism-based  
22 explanatory models.[44] Counterfactual thinking (Table 1) will be applied with the help of  
23 evidence that seems to refute or disagree with the emerging conclusions. For example, there  
24 could be an emerging conclusion that remuneration and related expectations around  
25 community engagement are a dominant mechanism determining outcomes, such as  
26 participant retention, in contexts of poverty and inequality. This observation would be  
27 considered against evidence of community engagement through which high participant  
28 retention has been successfully achieved without significant material gains being expected or  
29 received by the community.  
30  
31

32 These analytical phases will be done in consultation with the review team and stakeholders  
33 to further develop, refine or refute the initial programme theory, as well as consider historical  
34 context (for example, colonialism, ethically sound or exploitative research, and donor  
35 dynamics) of findings. The analysis and synthesis of review findings to draw conclusions will  
36 be a particularly iterative step in the process, and will likely involve further data extraction  
37 and identification of additional relevant literature (see Figure 2). Changes and developments  
38 in programme theories will be documented and transparently reported to show a trail of  
39 gradual theory building.  
40  
41  
42  
43  
44

#### 45 **Step 5: Disseminate, implement and evaluate**

46 The output of this proposed review is expected to have practical applications in NCD  
47 research, interventions and other health promotion efforts. To ensure this, further stakeholder  
48 consultation will be carried out in the form of discussions and realist interviews[70] with  
49 researchers, activists and community members in the research context in which SK and CED  
50 work in South Africa. These consultations will contribute to further iterations of the review  
51 steps as relevant, and form an evaluative component of the review, through which the six  
52 guiding principles can be further realised.[59] See Ethics and dissemination for further details  
53 about dissemination and implementation.  
54  
55

#### 56 **Patient and Public Involvement**

57 This realist review involves stakeholder consultation at different stages. Initial expert  
58 stakeholder consultation has targeted researchers internationally, whereas later stages will  
59 gather input from researchers, practitioners, community organisations and individuals in  
60



1  
2  
3 South Africa through the consultation process described above, and an adjacent qualitative  
4 study of community engagement in health research in South Africa. Utilising in-depth  
5 qualitative methods, such as realist interviews[70] in combination with informal online (email,  
6 video call) feedback consultations with experts, will enable capturing varied input on theories  
7 and other review findings from a range of stakeholders.  
8  
9

### 10 11 **Ethics and dissemination** 12

13 Formal ethics review is not required for the review itself, as it constitutes secondary research  
14 with elements of peer feedback from relevant researchers. Ethical approval has been  
15 obtained (M200641) from the University of the Witwatersrand Human Research Ethics  
16 Committee (Medical) for wider stakeholder consultation, including qualitative fieldwork with a  
17 range of participants. Dissemination will include traditional academic channels (publications,  
18 conferences, seminars), inclusion of findings in new community engagement strategies  
19 developed by authors for their research units, as well as sharing of findings at community  
20 engagement events in South Africa and beyond, through plain language publications or  
21 summaries, social media and in discussions with a wide range of stakeholders.  
22  
23  
24  
25  
26  
27  
28  
29  
30  
31  
32  
33  
34  
35  
36  
37  
38  
39  
40  
41  
42  
43  
44  
45  
46  
47  
48  
49  
50  
51  
52  
53  
54  
55  
56  
57  
58  
59  
60

## REFERENCES

- 1 Reynolds L, Sariola S. The ethics and politics of community engagement in global health research. *Crit. Public Health*. 2018;**28**:257–68. doi:10.1080/09581596.2018.1449598
- 2 King KF, Kolopack P, Merritt MW, *et al*. Community engagement and the human infrastructure of global health research. *BMC Med. Ethics*. 2014;**15**:84. doi:10.1186/1472-6939-15-84
- 3 Adhikari B, Pell C, Cheah PY. Community engagement and ethical global health research. *Glob Bioeth* 2020;**31**:1–12. doi:10.1080/11287462.2019.1703504
- 4 Marsh VM, Kamuya DK, Parker MJ, *et al*. Working with concepts: The role of community in international collaborative biomedical research. In: *Public Health Ethics*. Public Health Ethics 2011. 26–39. doi:10.1093/phe/phr007
- 5 Wilkinson A, Parker M, Martineau F, *et al*. Engaging ‘communities’: Anthropological insights from the west African ebola epidemic. *Philos Trans R Soc B Biol Sci* 2017;**372**. doi:10.1098/rstb.2016.0305
- 6 Hamed S, Klingberg S, Mahmud AJ, *et al*. Researching health in diverse neighbourhoods: critical reflection on the use of a community research model in Uppsala, Sweden. *BMC Res Notes* 2018;**11**:612. doi:10.1186/s13104-018-3717-7
- 7 Clinical and Translational Science Awards Consortium Community Engagement Key Function Committee Task Force on the Principles of Community Engagement. *Principles of Community Engagement, Second Edition*. 2011.
- 8 Adhikari B, Vincent R, Wong G, *et al*. A realist review of community engagement with health research. *Wellcome Open Res* 2019;**4**:87. doi:10.12688/wellcomeopenres.15298.2
- 9 Dickert N, Sugarman J. Ethical goals of community consultation in research. *Am. J. Public Health*. 2005;**95**:1123–7. doi:10.2105/AJPH.2004.058933
- 10 Bartholomew Eldredge LK, Markham CM, Ruitter RAC, *et al*. *Planning health promotion programs : an intervention mapping approach*. 4th editio. Jossey-Bass 2016.
- 11 O’Cathain A, Croot L, Duncan E, *et al*. Guidance on how to develop complex interventions to improve health and healthcare. *BMJ Open* 2019;**9**:e029954. doi:10.1136/bmjopen-2019-029954
- 12 Williams O, Sarre S, Papoulias SC, *et al*. Lost in the shadows: reflections on the dark side of co-production. *Heal. Res. policy Syst*. 2020;**18**:43. doi:10.1186/s12961-020-00558-0
- 13 Jagosh J, Macaulay AC, Pluye P, *et al*. Uncovering the Benefits of Participatory Research: Implications of a Realist Review for Health Research and Practice. *Milbank Q* 2012;**90**:311–46. doi:10.1111/j.1468-0009.2012.00665.x
- 14 Abimbola S. Beyond positive a priori bias: reframing community engagement in LMICs. *Health Promot Int* 2020;**35**:598–609. doi:10.1093/heapro/daz023
- 15 Ndinda C, Hongoro C, Chilwane D, *et al*. *Civil Society Activism for the Prevention and Treatment of Non-communicable Diseases in South Africa: Implications for Policy and Practice*. Springer, Cham 2015. 191–207. doi:10.1007/978-3-319-16166-2\_13

- 1  
2  
3 16 Ndinda C, Ndhlovu TP, Juma P, *et al.* The evolution of non-communicable diseases  
4 policies in post-apartheid South Africa. *BMC Public Health* 2018;**18**.  
5 doi:10.1186/s12889-018-5832-8  
6
- 7 17 Luna F, Luyckx VA. Why have Non-communicable Diseases been Left Behind? *Asian*  
8 *Bioeth Rev* 2020;**12**:5–25. doi:10.1007/s41649-020-00112-8  
9
- 10 18 Jagosh J, Bush PL, Salsberg J, *et al.* A realist evaluation of community-based  
11 participatory research: Partnership synergy, trust building and related ripple effects.  
12 *BMC Public Health* 2015;**15**:725. doi:10.1186/s12889-015-1949-1  
13
- 14 19 Waddell CM, Herron R V, Gobeil J, *et al.* Grounded in Culture: Reflections on Sitting  
15 Outside the Circle in Community-Based Research With Indigenous Men. *Qual Health*  
16 *Res* 2020;**30**:2343–50. doi:10.1177/1049732320960050  
17
- 18 20 Nyirenda D, Sariola S, Kingori P, *et al.* Structural coercion in the context of community  
19 engagement in global health research conducted in a low resource setting in Africa.  
20 *BMC Med Ethics* 2020;**21**:90. doi:10.1186/s12910-020-00530-1  
21
- 22 21 Bird-Naytowhow K, Hatala AR, Pearl T, *et al.* Ceremonies of Relationship: Engaging  
23 Urban Indigenous Youth in Community-Based Research. *Int J Qual Methods* 2017;**16**.  
24 doi:10.1177/1609406917707899  
25
- 26 22 Burgess RA, Jain S, Petersen I, *et al.* Social interventions: a new era for global mental  
27 health? *The Lancet Psychiatry*. 2020;**7**:118–9. doi:10.1016/S2215-0366(19)30397-9  
28
- 29 23 Campbell C, Burgess R. The role of communities in advancing the goals of the  
30 Movement for Global Mental Health. *Transcult Psychiatry* 2012;**49**:379–95.  
31 doi:10.1177/1363461512454643  
32
- 33 24 De Weger E, Van Vooren NJE, Drewes HW, *et al.* Searching for new community  
34 engagement approaches in the Netherlands: A realist qualitative study. *BMC Public*  
35 *Health* 2020;**20**:508. doi:10.1186/s12889-020-08616-6  
36
- 37 25 Sambieni NE. Differences and structural weaknesses of institutional mechanisms for  
38 health research ethics: Burkina Faso, Palestine, Peru, and Democratic Republic of the  
39 Congo. *BMC Med Ethics* 2018;**19**:47. doi:10.1186/s12910-018-0284-3  
40
- 41 26 Roth GA, Abate D, Abate KH, *et al.* Global, regional, and national age-sex-specific  
42 mortality for 282 causes of death in 195 countries and territories, 1980–2017: a  
43 systematic analysis for the Global Burden of Disease Study 2017. *Lancet*  
44 2018;**392**:1736–88. doi:10.1016/S0140-6736(18)32203-7  
45
- 46 27 Gouda HN, Charlson F, Sorsdahl K, *et al.* Burden of non-communicable diseases in  
47 sub-Saharan Africa, 1990-2017: results from the Global Burden of Disease Study  
48 2017. *Lancet Glob Heal* 2019;**7**:e1375–87. doi:10.1016/S2214-109X(19)30374-2  
49
- 50 28 Allotey P, Davey T, Reidpath DD. NCDs in low and middle-income countries -  
51 assessing the capacity of health systems to respond to population needs. *BMC Public*  
52 *Health* 2014;**14 Suppl 2**:S1. doi:10.1186/1471-2458-14-S2-S1  
53
- 54 29 Bosire E, Mendenhall E, Omondi GB, *et al.* When Diabetes Confronts HIV: Biological  
55 Sub-citizenship at a Public Hospital in Nairobi, Kenya. *Med Anthropol Q* 2018;**32**:574–  
56 92. doi:10.1111/maq.12476  
57
- 58 30 World Health Organization. WHO EMRO Health promotion and disease prevention  
59 through population-based interventions, including action to address social  
60 determinants and health inequity. 2021.<http://www.emro.who.int/about-who/public-health-functions/health-promotion-disease-prevention.html> (accessed 3 Feb 2021).

- 1  
2  
3 31 Lynch HM, Green AS, Clarke Nanyonga R, *et al.* Exploring patient experiences with  
4 and attitudes towards hypertension at a private hospital in Uganda: A qualitative study.  
5 *Int J Equity Health* 2019;**18**:206. doi:10.1186/s12939-019-1109-9  
6
- 7 32 Ware LJ, Pioreschi A, Bosire E, *et al.* Environmental, Social, and Structural  
8 Constraints for Health Behavior: Perceptions of Young Urban Black Women During  
9 the Preconception Period-A Healthy Life Trajectories Initiative. *J Nutr Educ Behav*  
10 2019;**51**:946–57. doi:10.1016/j.jneb.2019.04.009  
11
- 12 33 Draper CE, Bosire E, Pioreschi A, *et al.* Urban young women’s preferences for  
13 intervention strategies to promote physical and mental health preconception: A  
14 Healthy Life Trajectories Initiative (HeLTI). *Prev Med Reports* 2019;**14**.  
15 doi:10.1016/j.pmedr.2019.100846  
16
- 17 34 Draper CE, Pioreschi A, Ware LJ, *et al.* Pilot implementation of Bukhali: A  
18 preconception health trial in South Africa. *SAGE open Med*  
19 2020;**8**:2050312120940542. doi:10.1177/2050312120940542  
20
- 21 35 Morrison J, Akter K, Jennings HM, *et al.* Participatory learning and action to address  
22 type 2 diabetes in rural Bangladesh: A qualitative process evaluation. *BMC Endocr*  
23 *Disord* 2019;**19**:118. doi:10.1186/s12902-019-0447-3  
24
- 25 36 Mannell J, Davis K, Akter K, *et al.* Visual Participatory Analysis: A Qualitative Method  
26 for Engaging Participants in Interpreting the Results of Randomized Controlled Trials  
27 of Health Interventions. *J Mix Methods Res* 2020;:155868982091480.  
28 doi:10.1177/1558689820914806
- 29 37 Fottrell E, Ahmed N, Morrison J, *et al.* Community groups or mobile phone messaging  
30 to prevent and control type 2 diabetes and intermediate hyperglycaemia in  
31 Bangladesh (DMagic): a cluster-randomised controlled trial. *Lancet Diabetes*  
32 *Endocrinol* 2019;**7**:200–12. doi:10.1016/S2213-8587(19)30001-4  
33
- 34 38 Chibanda D, Mesu P, Kajawu L, *et al.* Problem-solving therapy for depression and  
35 common mental disorders in Zimbabwe: Piloting a task-shifting primary mental health  
36 care intervention in a population with a high prevalence of people living with HIV. *BMC*  
37 *Public Health* 2011;**11**:828. doi:10.1186/1471-2458-11-828  
38
- 39 39 Chibanda D, Weiss HA, Verhey R, *et al.* Effect of a primary care-based psychological  
40 intervention on symptoms of common mental disorders in Zimbabwe: A randomized  
41 clinical trial. *JAMA - J Am Med Assoc* 2016;**316**:2618–26.  
42 doi:10.1001/jama.2016.19102  
43
- 44 40 NCD Alliance. Our Views, Our Voices. 2021.[https://ncdalliance.org/what-we-](https://ncdalliance.org/what-we-do/capacity-development/our-views-our-voices)  
45 [do/capacity-development/our-views-our-voices](https://ncdalliance.org/what-we-do/capacity-development/our-views-our-voices) (accessed 19 Feb 2021).  
46
- 47 41 Nyirenda D, Sariola S, Gooding K, *et al.* ‘We are the eyes and ears of researchers and  
48 community’: Understanding the role of community advisory groups in representing  
49 researchers and communities in Malawi. *Dev World Bioeth* 2018;**18**:420–8.  
50 doi:10.1111/dewb.12163  
51
- 52 42 Mukumbang FC. *A realist evaluation of the antiretroviral treatment adherence club*  
53 *programme in the metropolitan area of the Western Cape Province, South Africa.*  
54 2018.  
55
- 56 43 Bhaskar R. *A realist theory of science.* Routledge/Taylor & Francis Group 2008.  
57
- 58 44 Mukumbang FC, van Wyk B. Leveraging the Photovoice Methodology for Critical  
59 Realist Theorizing. *Int J Qual Methods* 2020;**19**:160940692095898.  
60 doi:10.1177/1609406920958981

- 1  
2  
3 45 Jagosh J. Retroductive theorizing in Pawson and Tilley's applied scientific realism. *J Crit Realis* 2020;**19**:121–30. doi:10.1080/14767430.2020.1723301
- 4  
5  
6 46 de Souza DE. Culture, context and society - The underexplored potential of critical realism as a philosophical framework for theory and practice. *Asian J Soc Psychol* 2014;**17**:141–51. doi:10.1111/ajsp.12052
- 7  
8  
9  
10 47 Wong G, Greenhalgh T, Westhorp G, *et al.* RAMESES publication standards: Realist syntheses. *BMC Med* 2013;**11**:21. doi:10.1186/1741-7015-11-21
- 11  
12  
13 48 Pawson R, Greenhalgh T, Harvey G, *et al.* Realist review - A new method of systematic review designed for complex policy interventions. *J. Heal. Serv. Res. Policy*. 2005;**10**:21–34. doi:10.1258/1355819054308530
- 14  
15  
16  
17 49 Jagosh J. Realist Synthesis for Public Health: Building an Ontologically Deep Understanding of How Programs Work, For Whom, and In Which Contexts. *Annu Rev Public Health* 2019;**40**:361–72. doi:10.1146/annurev-publhealth-031816-044451
- 18  
19  
20  
21 50 De Weger E, Van Vooren NJE, Wong G, *et al.* What's in a Realist Configuration? Deciding Which Causal Configurations to Use, How, and Why. *Int J Qual Methods* 2020;**19**:160940692093857. doi:10.1177/1609406920938577
- 22  
23  
24  
25 51 Hinds K, Dickson K. Realist synthesis: a critique and an alternative. *J Crit Realis* 2021;**20**:1–17. doi:10.1080/14767430.2020.1860425
- 26  
27  
28  
29 52 Bhaskar R. Forms of realism. *Philosophica* 1975;**15**:99–127.
- 30  
31  
32  
33 53 Wiltshire G, Ronkainen N. A realist approach to thematic analysis: making sense of qualitative data through experiential, inferential and dispositional themes. *J Crit Realis* Published Online First: 2021. doi:10.1080/14767430.2021.1894909
- 34  
35  
36  
37 54 Pawson R, Tilley N. *Realistic Evaluation*. SAGE Publications Ltd 1997.
- 38  
39  
40  
41 55 Mukumbang FC, Marchal B, Van Belle S, *et al.* A realist approach to eliciting the initial programme theory of the antiretroviral treatment adherence club intervention in the Western Cape Province, South Africa. *BMC Med Res Methodol* 2018;**18**:47. doi:10.1186/s12874-018-0503-0
- 42  
43  
44  
45 56 Greenhalgh J, Manzano A. Understanding 'context' in realist evaluation and synthesis. *Int J Soc Res Methodol* 2021;;1–14. doi:10.1080/13645579.2021.1918484
- 46  
47  
48  
49 57 Ritz B. Comparing abduction and retroduction in Peircean pragmatism and critical realism. *J Crit Realis* 2020;**19**:456–65. doi:10.1080/14767430.2020.1831817
- 50  
51  
52  
53 58 Eastwood JG, Jalaludin BB, Kemp LA. Realist explanatory theory building method for social epidemiology:A protocol for a mixed method multilevel study of neighbourhood context and postnatal depression. *Springerplus* 2014;**3**:1–12. doi:10.1186/2193-1801-3-12
- 54  
55  
56  
57 59 Wong G, Greenhalgh T, Westhorp G, *et al.* RAMESES publication standards: Meta-narrative reviews. *BMC Med* 2013;**11**:20. doi:10.1186/1741-7015-11-20
- 58  
59  
60  
61 60 Caswell RJ, Maidment I, Ross JDC, *et al.* How, why, for whom and in what context, do sexual health clinics provide an environment for safe and supported disclosure of sexual violence: Protocol for a realist review. *BMJ Open*. 2020;**10**. doi:10.1136/bmjopen-2020-037599
- 62  
63  
64  
65 61 Abrams R, Wong G, Mahtani KR, *et al.* Understanding the impact of delegated home visiting services accessed via general practice by community-dwelling patients: A realist review protocol. *BMJ Open* 2018;**8**:24876. doi:10.1136/bmjopen-2018-024876
- 66  
67  
68  
69  
70

- 1  
2  
3 62 Duddy C, Wong G. Explaining variations in test ordering in primary care: protocol for a  
4 realist review. *BMJ Open*. 2018;**8**:e023117. doi:10.1136/bmjopen-2018-023117  
5  
6 63 Greenhalgh T, Thorne S, Malterud K. Time to challenge the spurious hierarchy of  
7 systematic over narrative reviews? *Eur J Clin Invest* 2018;**48**:e12931.  
8 doi:10.1111/eci.12931  
9  
10 64 Booth A, Briscoe S, Wright JM. The “realist search”: A systematic scoping review of  
11 current practice and reporting. *Res Synth Methods* 2020;**11**:14–35.  
12 doi:10.1002/jrsm.1386  
13  
14 65 Bates MJ. The design of browsing and berrypicking techniques for the online search  
15 interface. *Online Inf. Rev.* 1989;**13**:407–24. doi:10.1108/eb024320  
16  
17 66 Wong G, Westhrop G, Pawson R, *et al*. Realist synthesis RAMESES training  
18 materials.  
19 2013.[http://www.ramesesproject.org/index.php?pr=Project\\_outputs#method](http://www.ramesesproject.org/index.php?pr=Project_outputs#method).  
20 (accessed 22 Feb 2021).  
21  
22 67 Tyndall J. AACODS Checklist.  
23 2010.[https://dspace.flinders.edu.au/xmlui/bitstream/handle/2328/3326/AACODS\\_Chec](https://dspace.flinders.edu.au/xmlui/bitstream/handle/2328/3326/AACODS_Checklist.pdf;jsessionid=67E9E0E44805CE646B50C475C7ACD013?sequence=4)  
24 [klist.pdf;jsessionid=67E9E0E44805CE646B50C475C7ACD013?sequence=4](https://dspace.flinders.edu.au/xmlui/bitstream/handle/2328/3326/AACODS_Checklist.pdf;jsessionid=67E9E0E44805CE646B50C475C7ACD013?sequence=4)  
25 (accessed 19 Feb 2021).  
26  
27 68 Adams J, Hillier-Brown FC, Moore HJ, *et al*. Searching and synthesising ‘grey  
28 literature’ and ‘grey information’ in public health: Critical reflections on three case  
29 studies. *Syst Rev* 2016;**5**:164. doi:10.1186/s13643-016-0337-y  
30  
31 69 Critical Appraisal Skills Programme. CASP Checklists. 2021.[https://casp-uk.net/casp-](https://casp-uk.net/casp-tools-checklists/)  
32 [tools-checklists/](https://casp-uk.net/casp-tools-checklists/) (accessed 4 May 2021).  
33  
34 70 Mukumbang FC, Marchal B, Van Belle S, *et al*. Using the realist interview approach to  
35 maintain theoretical awareness in realist studies. *Qual Res* 2020;**20**:485–515.  
36 doi:10.1177/1468794119881985  
37  
38  
39  
40  
41  
42  
43  
44  
45  
46  
47  
48  
49  
50  
51  
52  
53  
54  
55  
56  
57  
58  
59  
60

### Authors' contributions

SK conceptualised the study with input from FCM, CED and BA. SK designed and drafted the review protocol. FCM, BA, CED, ENB, PT and DN contributed to protocol development. FCM and BA provided methodological guidance. BA and SK developed initial programme theories with input from other authors and stakeholders. BA, CED, FCM, ENB, PT and DN critically reviewed and edited the manuscript. All authors read and approved the final manuscript.

### Funding

The work of SK was supported by Koneen Säätiö (grant number 201901846).

### Conflict of interest

None to declare.

### Acknowledgements

The authors would like to thank all colleagues and stakeholders who have contributed time and feedback to this review protocol during globally challenging times. Eleanor Winpenny's initial inspiration for adopting a realist review approach is gratefully acknowledged.

### Figure titles

Figure 1 The role of community engagement in health interventions

Figure 2 Realist review process and cross-cutting principles[47–49,59]

Figure 3 Initial theories: potential community engagement trajectories in health research and interventions[8,13,18–20,49]



Figure 1 The role of community engagement in health interventions

157x67mm (150 x 150 DPI)





Figure 2 Realist review process and cross-cutting principles[47–49,59]

175x130mm (150 x 150 DPI)

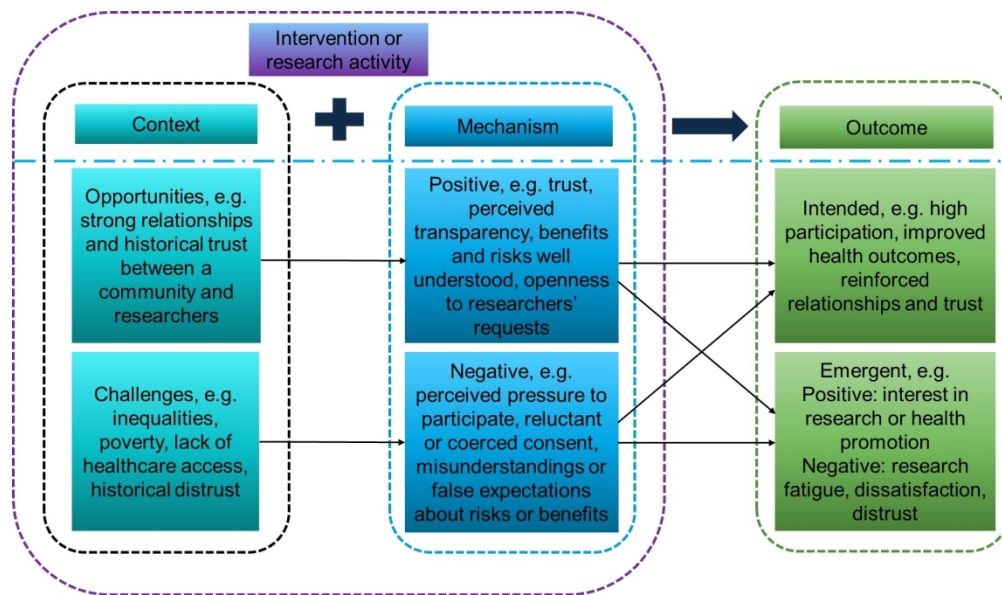

Figure 3 Initial theories: potential community engagement trajectories in health research and interventions[8,13,18–20,49]

319x187mm (150 x 150 DPI)

1  
2  
3 **Supplementary file 1: Initial searches by database**  
4

5 Engaging communities in non-communicable disease research and interventions in low- and  
6 middle-income countries: a realist review protocol  
7

8 Authors: Sonja Klingberg, Bipin Adhikari, Catherine E. Draper, Edna N. Bosire, Priscilla  
9 Tiigah, Deborah Nyirenda and Ferdinand C. Mukumbang  
10

11  
12 **Google Scholar:**  
13

14 "community engagement" AND ("low-income country" OR "middle-income country" OR Imic)  
15 AND ("non-communicable disease") AND (intervention OR prevention)  
16  
17

18  
19 **PubMed:**  
20

21 ("community engagement" OR participatory OR "community-led" OR stakeholder\*) AND  
22 ("low-income country" OR "middle-income country" OR Imic) AND (diabetes OR hypertension  
23 OR "blood pressure" OR cardiovascular OR cancer OR chronic OR "mental health" OR  
24 depression OR anxiety OR "non-communicable disease")  
25  
26

27  
28 **Scopus:**  
29

30 ("community engagement" OR participatory OR "community-led") AND ("low-income country"  
31 OR "middle-income country" OR Imic) AND ("non-communicable disease")  
32  
33  
34  
35  
36  
37  
38  
39  
40  
41  
42  
43  
44  
45  
46  
47  
48  
49  
50  
51  
52  
53  
54  
55  
56  
57  
58  
59  
60
