# Supplementary material for: Engaging communities in non-communicable disease research and interventions in low- and middle-income countries: a realist review protocol
Source: PubMed Central journal article supplement — BMJ Open. 2021 Jul 21;11(7):e050632. doi: 10.1136/bmjopen-2021-050632 (PMC8296813; doi:10.1136/bmjopen-2021-050632), 2021-07-21
Supplement: bmjopen-2021-050632supp001.pdf [file bmjopen-2021-050632supp001.pdf]

**Supplementary file 1: Initial searches by database**

Engaging communities in non-communicable disease research and interventions in low- and middle-income countries: a realist review protocol

Authors: Sonja Klingberg, Bipin Adhikari, Catherine E. Draper, Edna N. Bosire, Priscilla Tiigah, Deborah Nyirenda and Ferdinand C. Mukumbang

**Google Scholar:**

"community engagement" AND ("low-income country" OR "middle-income country" OR Imic) AND ("non-communicable disease") AND (intervention OR prevention)

**PubMed:**

("community engagement" OR participatory OR "community-led" OR stakeholder\*) AND ("low-income country" OR "middle-income country" OR Imic) AND (diabetes OR hypertension OR "blood pressure" OR cardiovascular OR cancer OR chronic OR "mental health" OR depression OR anxiety OR "non-communicable disease")

**Scopus:**

("community engagement" OR participatory OR "community-led") AND ("low-income country" OR "middle-income country" OR Imic) AND ("non-communicable disease")
